# Supplementary material for: Plasma DNA End-Motif Profiling as a Fragmentomic Marker in Cancer, Pregnancy, and Transplantation
Source: Oxford University Press journal article supplement (doi:10.1158/2159-8290.cd-19-0622), 2020-02-28
Supplement: 21598290cd190622-sup-223099_3_supp_6113220_q65mdc.pdf [file 21598290cd190622-sup-223099_3_supp_6113220_q65mdc.pdf]

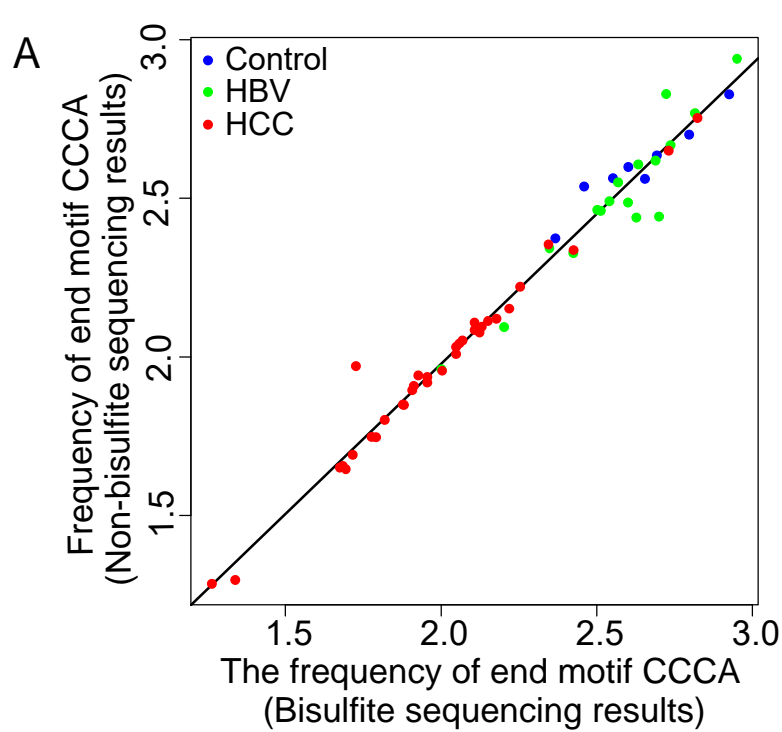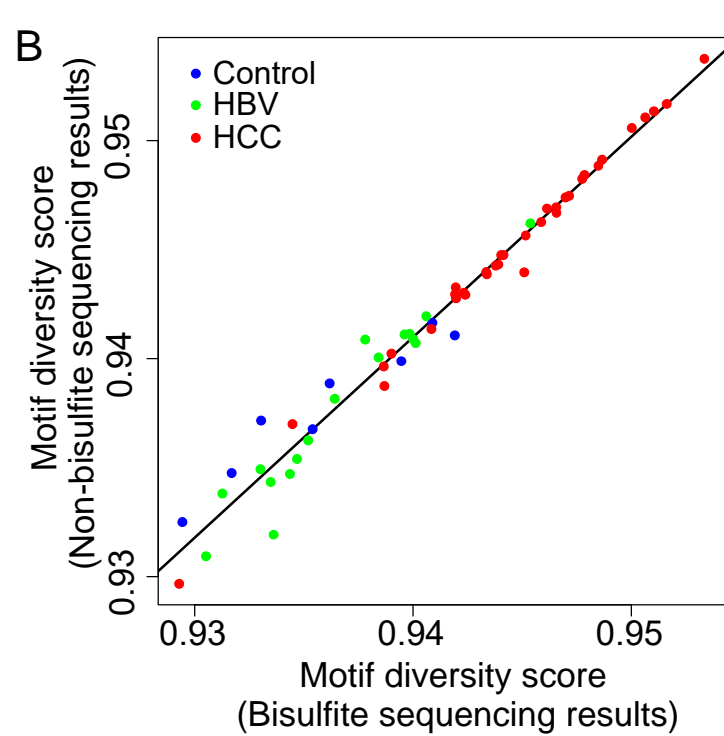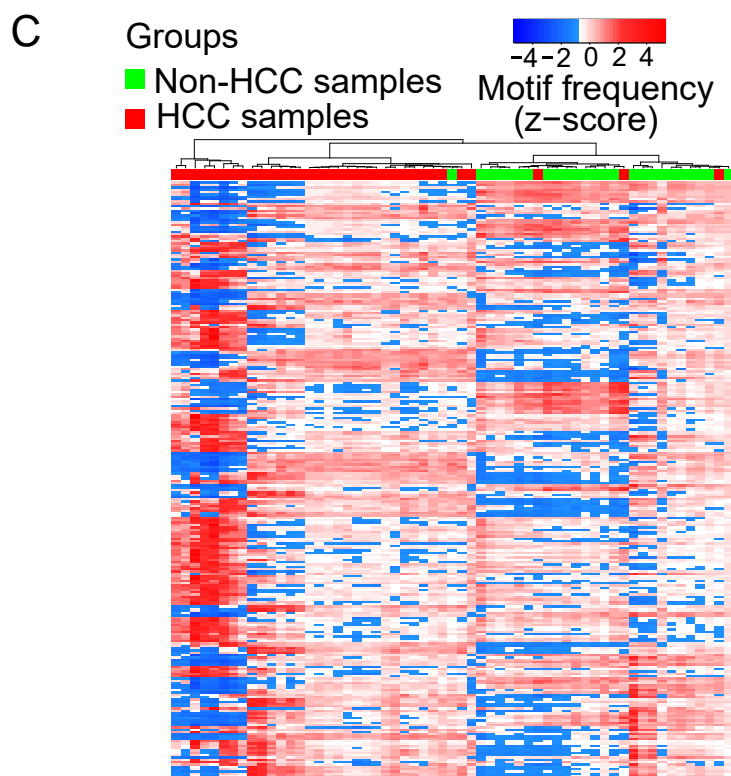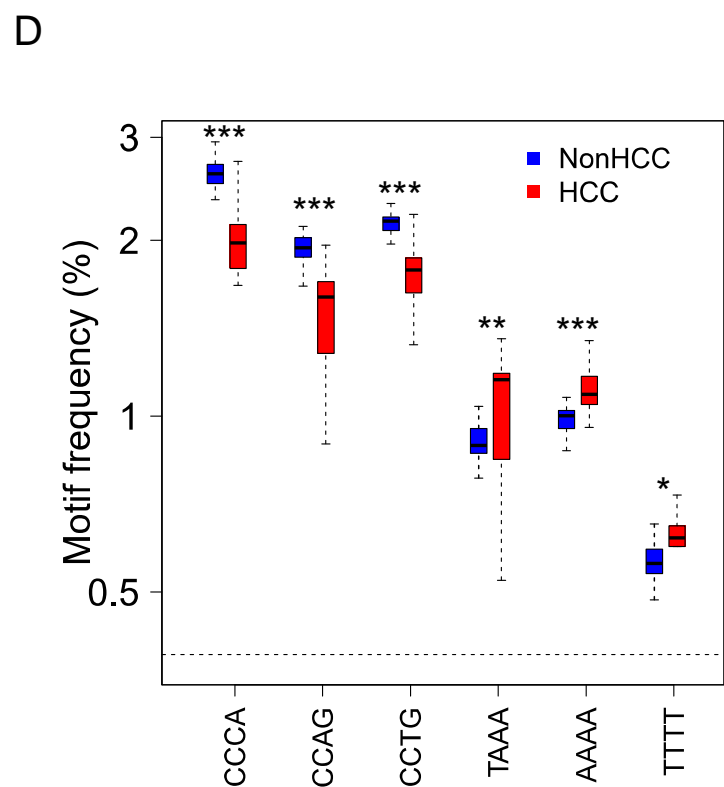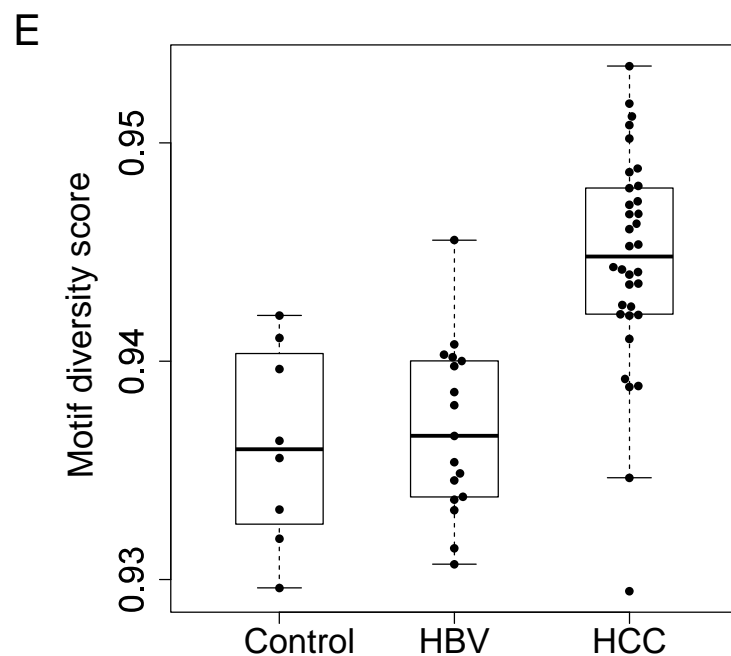

**Fig. S6. Comparison of plasma DNA motifs between bisulfite sequencing and non-bisulfite sequencing results.** (A) The frequency of plasma end motif CCCA. (B) Motif diversity scores (MDS). (C) Heatmap analysis of MDS between non-HCC and HCC samples. (D) Boxplot analysis of six representative motifs showing differential frequencies between non-HCC and HCC subjects. The grey dashed line indicates the frequency of 1/256. (E) Boxplot of MDS of plasma DNA end motifs among healthy control subjects (Control, n = 8), patients infected with chronic hepatitis B virus (HBV, n = 17), HCC (n = 34).
