# Supplementary material for: Plasma DNA End-Motif Profiling as a Fragmentomic Marker in Cancer, Pregnancy, and Transplantation
Source: Oxford University Press journal article supplement (doi:10.1158/2159-8290.cd-19-0622), 2020-02-28
Supplement: 21598290cd190622-sup-223099_3_supp_6113225_q65mdd.xlsx [file 21598290cd190622-sup-223099_3_supp_6113225_q65mdd.xlsx]

## Sheet: TableS1
Table S1. The motif frequencies of in plasma DNA of patients with and without HCC.
Sample ID	Group	CCCA	CCTG	CCAG	CCCT	CCTT	CCAA	CCAT	CCTC	CAAA	AAAA	CCAC	CCTA	CCCC	CTTT	TAAA	TATT	TGAA	CACA	TGTT	CAAG	CATT	TGAG	CAGG	CATG	CAGA	TGTG	TATA	TAAT	GGAA	GCCA	GGAG	TGTA	CAAT	TGAT	GCCT	TCTT	AGAA	GAAA	CATA	CACT	AAAT	TACA	AAAG	CTGA	TGCA	TTTT	GCTG	GGCT
AB010	Control	2.3743	2.0432	1.7908	1.5849	1.4993	1.3938	1.3372	1.3062	1.1295	0.9182	1.0691	0.9975	1.0718	0.8897	0.9462	0.9205	0.8911	0.9078	0.9463	0.8419	0.8367	0.895	0.7721	0.7614	0.7363	0.8827	0.7257	0.7067	0.7021	0.7793	0.7684	0.7327	0.6554	0.6823	0.7973	0.7264	0.5624	0.6159	0.5919	0.6489	0.5618	0.6692	0.5533	0.5603	0.6632	0.5507	0.6915	0.6409
AB020	Control	2.5992	2.2425	1.9334	1.7297	1.5562	1.4044	1.3451	1.4428	1.0672	0.7964	1.1528	0.9981	1.2167	0.8601	0.8318	0.7916	0.8019	0.92	0.8454	0.8479	0.8011	0.8896	0.823	0.7665	0.7262	0.8532	0.6101	0.6102	0.6801	0.8092	0.8187	0.6452	0.6068	0.6124	0.876	0.6844	0.5217	0.5633	0.544	0.6812	0.487	0.6193	0.4983	0.5581	0.6572	0.487	0.7685	0.7074
AB030	Control	2.5375	2.1991	1.9485	1.6667	1.4831	1.397	1.3144	1.388	1.0657	0.8128	1.1389	0.9619	1.1863	0.8309	0.8598	0.777	0.8236	0.8859	0.8501	0.852	0.7711	0.9234	0.8333	0.7485	0.7305	0.8796	0.6055	0.6159	0.6994	0.8172	0.8572	0.6451	0.5949	0.6134	0.8884	0.6781	0.5229	0.5871	0.5255	0.6503	0.4917	0.614	0.5102	0.5703	0.6699	0.4937	0.794	0.7039
AB040	Control	2.6356	2.2731	1.7141	1.7344	1.705	1.4137	1.5051	1.4277	1.1682	0.9557	1.0451	1.1479	1.1232	0.9823	0.7477	0.9078	0.8195	0.9991	0.8779	0.8946	0.9489	0.7126	0.7973	0.871	0.7856	0.7029	0.6934	0.6532	0.7654	0.7778	0.7378	0.6894	0.7383	0.696	0.7532	0.6325	0.6685	0.5922	0.6835	0.703	0.613	0.546	0.5963	0.6023	0.4836	0.5037	0.6015	0.6635
CTR242	Control	2.5612	2.1695	2.0152	1.6698	1.4645	1.5129	1.3924	1.3675	1.237	0.8728	1.1874	0.9675	1.1776	0.9572	0.8596	0.8148	0.9305	0.9476	0.9386	0.9615	0.803	0.911	0.9035	0.7916	0.827	0.8497	0.6024	0.6333	0.6992	0.7254	0.7605	0.7165	0.6577	0.6985	0.7315	0.646	0.6024	0.5447	0.5528	0.6684	0.516	0.5792	0.5652	0.7184	0.6641	0.5662	0.5942	0.6059
CTR245	Control	2.8276	2.1945	1.9847	1.8063	1.6101	1.7072	1.5868	1.432	1.407	0.9546	1.2529	1.132	1.2411	1.125	0.8395	0.8846	0.9462	1.0398	0.9308	1.0235	0.9172	0.7699	0.8387	0.8466	0.8362	0.7131	0.6676	0.6674	0.6878	0.6569	0.6313	0.7119	0.7779	0.7392	0.6161	0.6181	0.6725	0.5309	0.6593	0.712	0.5875	0.5544	0.6063	0.7769	0.5925	0.5716	0.4714	0.5192
CTR250	Control	2.5636	2.078	1.8837	1.6762	1.5403	1.5888	1.4872	1.3594	1.3913	0.978	1.1692	1.0426	1.1459	1.082	0.8752	0.8875	0.9784	1.0078	0.943	1.0135	0.9022	0.8016	0.87	0.8247	0.8721	0.7293	0.6586	0.6726	0.7011	0.6532	0.6514	0.7177	0.7553	0.7478	0.6216	0.6307	0.6914	0.5529	0.6396	0.6885	0.5917	0.5543	0.612	0.7889	0.5916	0.617	0.4832	0.5354
CTR253	Control	2.7009	2.2075	1.9383	1.7623	1.6299	1.6232	1.5454	1.41	1.3313	0.9518	1.1853	1.1189	1.1826	1.0623	0.8431	0.9097	0.9272	1.0175	0.9589	0.9757	0.9141	0.7581	0.8063	0.8408	0.8139	0.7603	0.6927	0.6727	0.7115	0.6876	0.6554	0.7519	0.7538	0.7247	0.6508	0.6472	0.6586	0.56	0.6608	0.7026	0.5942	0.5612	0.5897	0.7133	0.5754	0.5827	0.5041	0.5635
CTR231	Control	2.4497	2.1767	1.942	1.5976	1.4012	1.3832	1.2459	1.3423	1.0894	0.8344	1.1273	0.9027	1.1616	0.7757	0.9161	0.786	0.9	0.8466	0.9332	0.8545	0.7067	1.0224	0.8468	0.7239	0.7389	0.9741	0.5977	0.6139	0.7135	0.8472	0.8896	0.7179	0.5634	0.6473	0.9049	0.7097	0.5134	0.6145	0.4962	0.6144	0.4674	0.6434	0.514	0.5798	0.7721	0.4719	0.8304	0.6951
CTR232	Control	2.3786	2.0735	1.8485	1.5622	1.4745	1.4303	1.2982	1.3009	1.1282	0.889	1.1052	0.9745	1.0796	0.8181	0.9824	0.8813	0.9255	0.868	0.9904	0.8288	0.7893	0.9738	0.7488	0.7449	0.6982	0.9826	0.6843	0.6806	0.7229	0.8268	0.8038	0.7591	0.6143	0.6834	0.8608	0.7637	0.526	0.6633	0.5556	0.6274	0.5201	0.6995	0.5352	0.5262	0.7669	0.4894	0.8102	0.6391
CTR233	Control	2.3001	2.0017	1.7671	1.5158	1.453	1.3956	1.2651	1.2656	1.1236	0.9202	1.0698	0.9629	1.043	0.8111	1.0279	0.9206	0.938	0.8588	1.0099	0.7993	0.7945	0.9658	0.7091	0.7281	0.6805	0.9955	0.7179	0.7062	0.7344	0.838	0.8106	0.7759	0.6137	0.6848	0.8719	0.7865	0.5202	0.693	0.5611	0.6213	0.5355	0.7226	0.5335	0.5092	0.7802	0.4841	0.8178	0.6502
CTR234	Control	2.2858	2.021	1.8466	1.486	1.4018	1.4193	1.2839	1.2322	1.1633	0.9205	1.0884	0.9527	1.0185	0.8185	1.0492	0.9139	0.9734	0.8735	1.0137	0.8542	0.7648	1.0168	0.7684	0.7502	0.7342	1.0209	0.7135	0.7131	0.7254	0.7591	0.835	0.7825	0.6224	0.7066	0.7611	0.7834	0.5389	0.6637	0.5606	0.6108	0.5314	0.7218	0.5545	0.5623	0.793	0.5105	0.7494	0.5981
CTR235	Control	2.2653	1.9815	1.7993	1.4949	1.4212	1.3917	1.2595	1.2524	1.1582	0.8872	1.0661	0.9218	1.0293	0.8372	1.0073	0.8641	0.9577	0.8582	0.9806	0.8448	0.7646	1.0037	0.7806	0.7246	0.7429	0.9858	0.6777	0.6813	0.7196	0.803	0.8073	0.7612	0.612	0.6888	0.8513	0.7521	0.5483	0.6505	0.5459	0.6112	0.5143	0.6947	0.5376	0.588	0.8027	0.468	0.7798	0.6436
CTR236	Control	2.4493	2.1651	1.9332	1.5934	1.4386	1.4228	1.2873	1.3313	1.0951	0.8224	1.1361	0.9344	1.1235	0.7879	0.9104	0.7962	0.8951	0.8571	1.0078	0.848	0.7241	1.0124	0.8009	0.7423	0.7189	1.0328	0.6017	0.6185	0.7337	0.8686	0.8898	0.7346	0.5777	0.654	0.908	0.7393	0.5011	0.6318	0.5081	0.6187	0.4663	0.6545	0.5148	0.5591	0.7703	0.4722	0.8564	0.6975
CTR237	Control	2.3202	2.0421	1.8242	1.5316	1.4443	1.3872	1.2626	1.2894	1.1094	0.8614	1.0841	0.9341	1.0625	0.8154	0.9594	0.8284	0.91	0.8533	0.97	0.8293	0.7706	0.9927	0.7665	0.7337	0.7097	0.9976	0.6355	0.6453	0.7188	0.8386	0.8355	0.7339	0.5944	0.6622	0.894	0.7547	0.5191	0.6615	0.5346	0.6165	0.4978	0.6722	0.5263	0.548	0.7614	0.4959	0.8403	0.6678
CTR238	Control	2.1752	1.9953	1.7908	1.4859	1.3916	1.2712	1.1645	1.2887	1.0998	0.8214	1.028	0.8298	1.047	0.8432	0.93	0.7644	0.928	0.83	0.9136	0.8619	0.7481	1.034	0.8951	0.7025	0.7805	0.926	0.5711	0.6135	0.6878	0.7648	0.8398	0.6877	0.5663	0.644	0.8779	0.6903	0.5576	0.5975	0.488	0.619	0.474	0.6025	0.5084	0.6314	0.7259	0.5078	0.775	0.6946
CTR239	Control	2.4327	2.1643	1.9032	1.5952	1.4666	1.4023	1.2685	1.3403	1.0831	0.8424	1.1138	0.9534	1.1132	0.7996	0.9362	0.8286	0.8944	0.8568	0.9588	0.8314	0.7592	0.9832	0.7805	0.7383	0.6973	0.9817	0.6429	0.6389	0.7218	0.8261	0.8722	0.7371	0.5826	0.652	0.879	0.7425	0.5097	0.6408	0.5303	0.6305	0.4936	0.6652	0.5121	0.5382	0.7664	0.4716	0.8414	0.6811
CTR240	Control	2.2306	1.9548	1.7738	1.4868	1.4331	1.3977	1.2647	1.2456	1.1883	0.9216	1.0542	0.932	1.0169	0.8569	1.0411	0.8819	0.9711	0.8583	0.9846	0.853	0.7936	0.9986	0.7825	0.7299	0.7551	0.9738	0.6913	0.6993	0.7148	0.7826	0.7898	0.763	0.6314	0.694	0.8242	0.7574	0.5652	0.6674	0.5639	0.6053	0.5358	0.6837	0.5514	0.5911	0.7509	0.5409	0.7589	0.6144
CTR241	Control	2.292	2.0185	1.8463	1.5178	1.4038	1.3957	1.2447	1.2733	1.1514	0.8111	1.0832	0.9102	1.0609	0.7938	0.935	0.758	0.9492	0.8664	0.9674	0.8765	0.7484	1.0468	0.8321	0.7429	0.7709	1.0164	0.5774	0.6035	0.725	0.828	0.8581	0.7284	0.5936	0.6678	0.8702	0.725	0.5264	0.65	0.5227	0.6085	0.4623	0.6494	0.5232	0.6035	0.7793	0.4855	0.8099	0.6525
CTR249	Control	2.3186	2.043	1.8129	1.531	1.4327	1.3749	1.2497	1.2905	1.1173	0.8544	1.0756	0.9275	1.0673	0.8047	0.9579	0.8306	0.9227	0.8572	0.9808	0.8304	0.7843	0.9936	0.7735	0.7328	0.7153	0.9945	0.6302	0.6418	0.7285	0.833	0.8426	0.7409	0.5949	0.6691	0.8912	0.7428	0.5162	0.6647	0.5344	0.6247	0.4955	0.6735	0.5204	0.5496	0.7762	0.4921	0.8286	0.6766
CTR243	Control	2.233	1.9697	1.7408	1.4998	1.4801	1.3786	1.2626	1.2608	1.1393	0.916	1.0442	0.9516	1.0167	0.866	1.0103	0.8993	0.9206	0.8616	1.0237	0.8136	0.8365	0.942	0.7318	0.7309	0.7021	1.0125	0.7053	0.697	0.7101	0.7937	0.7759	0.8087	0.6276	0.6737	0.8512	0.7568	0.5433	0.6678	0.5741	0.6259	0.5519	0.683	0.5389	0.5373	0.731	0.5289	0.7805	0.6486
CTR244	Control	2.112	1.8688	1.7529	1.4123	1.3511	1.3475	1.2021	1.1643	1.2146	0.8968	1.013	0.8438	0.971	0.8816	1.0139	0.8472	0.994	0.8486	1.1207	0.8776	0.783	1.057	0.8225	0.7223	0.7762	1.0763	0.5933	0.6632	0.7121	0.7573	0.8169	0.8016	0.6147	0.7085	0.8013	0.7572	0.5458	0.6811	0.5107	0.6053	0.4937	0.6654	0.5486	0.5953	0.7843	0.6214	0.789	0.6358
CTR251	Control	2.2253	1.9469	1.7673	1.479	1.408	1.3791	1.244	1.2434	1.1912	0.9238	1.0496	0.9128	1.0261	0.8352	1.047	0.888	0.9876	0.8675	0.9978	0.8612	0.7941	1.0138	0.8068	0.7325	0.7652	0.9714	0.6841	0.7028	0.7251	0.7768	0.8012	0.7589	0.6284	0.7071	0.8172	0.7441	0.5634	0.6693	0.5567	0.615	0.5281	0.6892	0.5499	0.5894	0.768	0.5187	0.7462	0.6228
CTR246	Control	2.2449	1.9516	1.7529	1.4818	1.432	1.4192	1.2834	1.2336	1.1939	0.9529	1.0613	0.9515	1.0162	0.8639	1.0658	0.9301	0.9658	0.8632	1.0544	0.8364	0.8107	0.9701	0.7405	0.739	0.7285	1.0468	0.7261	0.7258	0.7167	0.781	0.77	0.8337	0.6423	0.7046	0.8026	0.7754	0.5537	0.6811	0.5762	0.61	0.5556	0.7107	0.5588	0.5663	0.7562	0.5586	0.7497	0.604
CTR247	Control	2.2887	1.9654	1.7714	1.4976	1.4328	1.4178	1.272	1.2423	1.1868	0.9126	1.0639	0.9569	1.0332	0.8224	1.0454	0.879	0.9809	0.8719	1.005	0.8433	0.7947	1.0085	0.7604	0.7405	0.732	0.9927	0.6823	0.6974	0.7327	0.8021	0.8006	0.7681	0.6303	0.7024	0.8168	0.759	0.5472	0.6924	0.57	0.6086	0.5232	0.7098	0.5421	0.553	0.777	0.5239	0.7689	0.6072
CTR248	Control	2.3933	2.1077	1.8862	1.5638	1.4256	1.4126	1.2765	1.304	1.1397	0.8791	1.1155	0.9563	1.1059	0.813	0.972	0.8388	0.9258	0.865	0.9637	0.8602	0.7486	0.9954	0.8064	0.7508	0.7326	0.9673	0.648	0.6565	0.7366	0.8238	0.8632	0.7416	0.6049	0.671	0.8238	0.7367	0.5264	0.6471	0.5397	0.6193	0.5058	0.6733	0.5387	0.559	0.7603	0.4616	0.7928	0.6635
CTR252	Control	2.5057	2.1588	1.9154	1.6171	1.5155	1.4945	1.3538	1.3337	1.128	0.8712	1.1514	1.0242	1.1034	0.8358	0.9652	0.8717	0.9066	0.8822	0.9823	0.8374	0.7904	0.9511	0.7288	0.7601	0.6898	0.9787	0.6842	0.6729	0.7268	0.8387	0.8203	0.7577	0.6224	0.6749	0.8302	0.7667	0.5138	0.6486	0.5659	0.6315	0.5192	0.6922	0.5387	0.5257	0.7605	0.4966	0.8077	0.6449
CTR254	Control	2.5143	2.2382	1.9982	1.6324	1.415	1.3978	1.2574	1.365	1.0613	0.7872	1.1535	0.9125	1.1794	0.7621	0.8674	0.747	0.8732	0.8536	0.9196	0.854	0.6982	1.0195	0.8468	0.7298	0.7266	0.9872	0.5678	0.586	0.7286	0.8909	0.9323	0.7027	0.5492	0.6287	0.948	0.7057	0.4897	0.604	0.4843	0.6229	0.4401	0.6313	0.4954	0.5667	0.7685	0.4624	0.8759	0.7486
CTR255	Control	2.1218	1.8876	1.7477	1.415	1.3662	1.3505	1.2264	1.1705	1.1707	0.9451	1.0133	0.8884	0.9756	0.8381	1.0666	0.8896	0.9824	0.8324	1.0339	0.837	0.7776	1.0222	0.7506	0.7221	0.7281	1.0397	0.6818	0.7082	0.7083	0.8164	0.7661	0.8102	0.6268	0.7065	0.8647	0.7711	0.5467	0.7269	0.543	0.5946	0.5396	0.6897	0.5646	0.5588	0.8184	0.5807	0.8373	0.6083
CTR256	Control	2.1654	1.8985	1.7531	1.4484	1.4145	1.3965	1.2533	1.2093	1.2247	0.9889	1.0416	0.9146	1.0004	0.8628	1.1161	0.9203	0.9817	0.8533	0.9748	0.8597	0.7935	0.9988	0.7882	0.718	0.7624	0.956	0.7169	0.7422	0.713	0.7508	0.7634	0.7459	0.65	0.6972	0.803	0.7831	0.5713	0.7036	0.561	0.597	0.5661	0.7039	0.5695	0.5767	0.7326	0.5864	0.7517	0.5729
CTR257	Control	2.2539	1.9524	1.822	1.4691	1.388	1.4449	1.2786	1.2076	1.2215	0.9522	1.0807	0.9276	1.0197	0.8294	1.1078	0.9078	0.9894	0.8495	0.9982	0.8665	0.7506	1.0204	0.7763	0.7262	0.7596	1.004	0.716	0.734	0.7193	0.7937	0.7993	0.7751	0.6375	0.7081	0.8141	0.7828	0.5495	0.6856	0.5498	0.5822	0.5426	0.7164	0.5642	0.5917	0.7625	0.5269	0.771	0.5978
CTR258	Control	2.2269	1.963	1.8027	1.484	1.4124	1.4033	1.2537	1.2364	1.1783	0.9303	1.0667	0.9167	1.0301	0.8261	1.0515	0.8788	0.9525	0.8551	0.9745	0.8515	0.7767	1.0008	0.7794	0.7228	0.741	0.9721	0.6841	0.7053	0.7215	0.8043	0.8087	0.7395	0.628	0.6858	0.8531	0.7703	0.5417	0.6898	0.5438	0.605	0.535	0.6897	0.549	0.5653	0.7492	0.5336	0.798	0.6311
CTR259	Control	2.453	2.1026	1.9206	1.5893	1.4457	1.4759	1.3094	1.2887	1.172	0.8914	1.1328	0.9596	1.1213	0.7966	1.0077	0.8605	0.9454	0.8635	0.972	0.8653	0.7182	0.9979	0.7943	0.7244	0.7383	0.9667	0.678	0.6884	0.7367	0.8575	0.8433	0.7398	0.6136	0.6799	0.8778	0.7549	0.5233	0.6744	0.523	0.6045	0.5031	0.6914	0.5389	0.5682	0.7577	0.5023	0.8203	0.6578
CTR260	Control	2.3062	2.0127	1.8544	1.521	1.3986	1.4005	1.2539	1.2571	1.1836	0.9424	1.0834	0.9009	1.0866	0.8221	1.0355	0.8726	0.957	0.8522	1.0106	0.8702	0.7222	1.0086	0.8356	0.7045	0.7692	0.9392	0.6572	0.6974	0.7189	0.7963	0.8316	0.7308	0.6136	0.681	0.838	0.738	0.5561	0.6643	0.5149	0.5954	0.5266	0.6742	0.5531	0.5963	0.7243	0.5364	0.774	0.641
CTR261	Control	2.3112	2.0319	1.8321	1.5658	1.4744	1.4068	1.2682	1.2872	1.1555	0.9096	1.0869	0.9284	1.096	0.8309	0.9977	0.8551	0.9295	0.8567	0.943	0.8472	0.7607	0.969	0.794	0.7084	0.7368	0.91	0.6507	0.681	0.7191	0.8091	0.8074	0.7048	0.6148	0.6654	0.8829	0.745	0.5482	0.6654	0.5229	0.6203	0.5277	0.665	0.5397	0.5643	0.7156	0.517	0.7983	0.6563
CTR262	Control	2.3347	2.0568	1.8788	1.5515	1.4137	1.3877	1.2477	1.2922	1.156	0.8842	1.095	0.8899	1.1045	0.8064	0.9818	0.8069	0.9486	0.8506	0.943	0.8795	0.7047	1.0253	0.8721	0.7044	0.786	0.9245	0.6092	0.6557	0.7183	0.8066	0.8503	0.7003	0.5948	0.6682	0.8612	0.7202	0.5546	0.6419	0.4933	0.6004	0.4912	0.6487	0.5338	0.6053	0.7248	0.5015	0.7889	0.6622
CTR263	Control	2.5006	2.24	1.9912	1.6434	1.4492	1.4036	1.2732	1.3731	1.0889	0.8344	1.1506	0.916	1.1919	0.7822	0.8931	0.7791	0.861	0.8507	0.9203	0.8533	0.6888	0.9825	0.8459	0.7159	0.7294	0.9467	0.5765	0.6117	0.713	0.8667	0.8882	0.6851	0.5663	0.6237	0.94	0.7246	0.4993	0.6203	0.4808	0.6222	0.468	0.6255	0.5094	0.5602	0.7213	0.4941	0.8814	0.7293
CTR264	Control	2.2787	1.9928	1.8051	1.5254	1.4603	1.421	1.2781	1.2574	1.1673	0.9172	1.0752	0.9415	1.056	0.8313	1.0361	0.8913	0.9403	0.8561	0.9558	0.8361	0.7492	0.9592	0.7608	0.7078	0.7266	0.9265	0.7037	0.7122	0.7201	0.8212	0.7954	0.7345	0.6221	0.6768	0.8741	0.7782	0.5423	0.6828	0.54	0.6095	0.5398	0.6915	0.5383	0.5575	0.7243	0.4804	0.8033	0.6502
TBR1695	CRC	2.2903	2.0176	1.8517	1.5166	1.4191	1.4338	1.283	1.2421	1.1762	0.9181	1.0883	0.9179	1.0551	0.8151	1.0229	0.8938	0.9481	0.8497	1.0297	0.8547	0.7282	1.0015	0.7777	0.7178	0.7371	1.0113	0.6578	0.6953	0.7317	0.8282	0.8347	0.752	0.6152	0.6864	0.8687	0.7969	0.5266	0.6922	0.5143	0.5987	0.5127	0.6882	0.5513	0.5742	0.7521	0.5501	0.8151	0.6485
TBR2025	CRC	2.3166	2.0656	1.8587	1.537	1.4122	1.3421	1.2297	1.2995	1.0953	0.8416	1.0876	0.8724	1.0972	0.7938	0.9129	0.7786	0.8943	0.8462	0.935	0.846	0.7149	1.008	0.837	0.7094	0.7375	0.957	0.5594	0.6203	0.7135	0.8319	0.8626	0.6791	0.5695	0.6429	0.9084	0.7441	0.5161	0.6493	0.4744	0.6185	0.4713	0.6335	0.516	0.5687	0.739	0.5245	0.851	0.6982
TBR2076	CRC	2.1731	1.8969	1.7686	1.4452	1.3972	1.4037	1.2602	1.1973	1.2278	0.9865	1.0468	0.9098	0.9929	0.8554	1.1014	0.8996	0.9726	0.836	0.9582	0.8689	0.7641	0.99	0.7961	0.7142	0.7727	0.9362	0.6959	0.733	0.7229	0.7715	0.7993	0.7286	0.641	0.6869	0.806	0.7758	0.5644	0.7026	0.5391	0.5833	0.5584	0.6927	0.5793	0.5997	0.7177	0.5948	0.7448	0.6065
TBR2077	CRC	2.2093	1.9269	1.7984	1.4695	1.3927	1.3982	1.2451	1.2191	1.1944	0.8925	1.0625	0.8968	1.0239	0.8159	1.0214	0.8077	0.952	0.8498	0.9566	0.8638	0.7559	1.0186	0.7956	0.7159	0.7573	0.9749	0.6078	0.6591	0.7305	0.8063	0.8369	0.7098	0.6222	0.6718	0.8617	0.7623	0.5295	0.7085	0.5193	0.5962	0.5015	0.6708	0.5396	0.5787	0.7413	0.5491	0.8095	0.6349
TBR2190	CRC	2.2242	1.9423	1.7764	1.4703	1.3905	1.389	1.2395	1.2178	1.1713	0.9618	1.0602	0.908	1.0343	0.8005	1.0989	0.9293	0.9693	0.8447	1.0189	0.827	0.7443	1.0009	0.7577	0.7037	0.7213	0.9873	0.7115	0.7445	0.7172	0.7911	0.7963	0.7557	0.6163	0.693	0.8397	0.7964	0.535	0.7038	0.5255	0.599	0.5391	0.7218	0.5508	0.5421	0.7593	0.5546	0.7879	0.6174
TBR2251	CRC	2.2374	2.0058	1.8142	1.5226	1.4673	1.3811	1.2458	1.2774	1.1086	0.8633	1.066	0.911	1.0436	0.8202	0.9765	0.818	0.8905	0.8192	0.9185	0.8236	0.7618	0.9675	0.7599	0.7027	0.7093	0.938	0.6264	0.6544	0.7149	0.8316	0.8308	0.6856	0.5911	0.6382	0.9271	0.7752	0.5154	0.6777	0.5036	0.6051	0.5088	0.6605	0.5247	0.5441	0.7146	0.5209	0.8568	0.6831
TBR2273	CRC	2.3472	2.0989	1.9076	1.5539	1.4156	1.4054	1.2613	1.2967	1.1248	0.8701	1.1091	0.9064	1.1015	0.7883	0.9584	0.7994	0.9135	0.8524	0.9318	0.8604	0.7118	1.0169	0.8332	0.7177	0.7465	0.962	0.6039	0.641	0.713	0.8227	0.86	0.6979	0.5865	0.6556	0.8857	0.7555	0.5191	0.6483	0.4968	0.609	0.4814	0.6535	0.5315	0.5797	0.7399	0.53	0.8283	0.6656
TBR2276	CRC	2.2646	1.9963	1.8739	1.4794	1.3128	1.3608	1.2121	1.2208	1.1463	0.8393	1.0826	0.8471	1.0773	0.7568	0.9545	0.7414	0.943	0.8302	0.9983	0.8828	0.6752	1.0691	0.8618	0.7055	0.7724	1.0277	0.5408	0.6128	0.7228	0.8476	0.8907	0.7171	0.5758	0.6545	0.8952	0.7159	0.5132	0.6661	0.4657	0.5752	0.4521	0.6346	0.5297	0.5967	0.7912	0.5248	0.8599	0.6767
TBR2419	CRC	2.2437	1.9559	1.8324	1.4744	1.3645	1.3996	1.2431	1.2167	1.1972	0.9106	1.0772	0.8871	1.0365	0.7887	1.0629	0.8537	0.988	0.842	0.9656	0.8772	0.7135	1.0402	0.83	0.7095	0.7785	0.965	0.6491	0.7061	0.7315	0.8068	0.8406	0.7212	0.6115	0.6908	0.8405	0.7585	0.5438	0.685	0.5036	0.5882	0.5056	0.6857	0.5477	0.5938	0.7506	0.5433	0.7758	0.6417
TBR2491	CRC	1.8843	1.6657	1.6175	1.2673	1.173	1.1965	1.0585	1.0856	1.2289	0.9122	0.948	0.7013	0.9108	0.7868	1.1128	0.7473	1.1305	0.8348	0.9165	0.9355	0.6386	1.1872	1.0414	0.6424	0.9376	0.8901	0.5352	0.6849	0.6979	0.6824	0.8377	0.6613	0.5797	0.7252	0.701	0.6808	0.6433	0.655	0.4317	0.5499	0.4693	0.6367	0.5616	0.7319	0.7348	0.627	0.6258	0.5872
GM0742	HBV	2.8288	2.2472	2.0442	1.8811	1.6657	1.718	1.5895	1.498	1.4103	0.9576	1.305	1.142	1.3245	1.1611	0.8432	0.8338	0.881	1.0437	0.8596	0.9797	0.9547	0.7236	0.8318	0.8228	0.8198	0.6605	0.6406	0.6503	0.6616	0.67	0.6154	0.6422	0.7859	0.6745	0.6751	0.6084	0.663	0.5523	0.6625	0.7362	0.5971	0.5622	0.588	0.7448	0.5914	0.5097	0.5009	0.5357
GM0936	HBV	2.668	2.1543	1.9041	1.7452	1.6538	1.6551	1.5592	1.3989	1.3462	0.9898	1.2078	1.1574	1.1682	1.1247	0.8614	0.9399	0.9219	0.9972	1.0094	0.935	0.958	0.7291	0.7449	0.8319	0.764	0.7242	0.7373	0.6965	0.7056	0.7165	0.6508	0.7413	0.7799	0.7296	0.6888	0.653	0.6463	0.5855	0.6941	0.6984	0.6323	0.5892	0.6108	0.674	0.5957	0.5623	0.5258	0.5584
GM1196	HBV	2.461	2.0055	1.8738	1.6201	1.4981	1.5609	1.4505	1.2829	1.3364	1.0139	1.1498	1.0233	1.1098	1.0882	0.9621	0.9268	0.9642	0.9515	1.0391	0.9347	0.8945	0.8384	0.7959	0.7905	0.7959	0.7956	0.7205	0.7315	0.6827	0.7063	0.6701	0.7394	0.7479	0.7282	0.6896	0.6701	0.6362	0.5929	0.6342	0.659	0.6142	0.6271	0.6125	0.6801	0.6448	0.6412	0.5399	0.5415
GM2172	HBV	2.9404	2.2433	2.0453	1.9398	1.7403	1.7467	1.6227	1.5155	1.4035	0.9331	1.3204	1.1886	1.366	1.1715	0.8537	0.8375	0.814	1.0715	0.7931	0.9642	0.9654	0.6826	0.7908	0.8262	0.7916	0.6207	0.658	0.6635	0.6707	0.7057	0.6344	0.5937	0.7975	0.6298	0.7026	0.6216	0.6293	0.5616	0.6809	0.7482	0.5946	0.5898	0.5704	0.6898	0.5496	0.4845	0.5266	0.5892
GM2465	HBV	2.4428	1.9684	1.8777	1.5927	1.4376	1.4643	1.3395	1.2844	1.1901	0.9095	1.1358	0.9581	1.1216	0.9264	0.9978	0.8678	0.9048	0.9134	0.9053	0.8618	0.8105	0.915	0.7708	0.7251	0.7406	0.8559	0.6817	0.6958	0.6826	0.7583	0.7627	0.6841	0.6554	0.6618	0.7933	0.7015	0.5678	0.6202	0.5672	0.6432	0.545	0.6712	0.5427	0.6072	0.6852	0.5682	0.6722	0.6132
GM2471	HBV	2.4397	2.0698	1.9146	1.5878	1.4664	1.463	1.3435	1.3083	1.1631	0.925	1.1364	0.9839	1.0948	0.9107	0.9599	0.901	0.9006	0.9065	0.9354	0.8607	0.811	0.8872	0.7683	0.7471	0.7242	0.8564	0.6936	0.7003	0.6987	0.7825	0.7701	0.7081	0.647	0.6729	0.7928	0.7128	0.5658	0.6135	0.5672	0.6501	0.5557	0.6592	0.559	0.5848	0.6855	0.5594	0.6634	0.6456
GM2546	HBV	2.4872	2.0977	1.9634	1.6433	1.4915	1.4994	1.3767	1.3371	1.2145	0.9335	1.1693	0.9844	1.1456	0.9385	0.9338	0.8679	0.9095	0.9371	0.9216	0.8904	0.8266	0.8787	0.8183	0.746	0.7649	0.8119	0.6662	0.6807	0.6901	0.7599	0.7463	0.6971	0.6675	0.6751	0.7914	0.6844	0.5839	0.5958	0.5726	0.6702	0.5527	0.6361	0.5527	0.6231	0.6782	0.571	0.6376	0.6341
GM2721	HBV	2.4641	2.0531	1.8957	1.5986	1.4324	1.4533	1.3409	1.297	1.1701	0.9178	1.1338	0.9766	1.1216	0.9146	0.9636	0.8989	0.9039	0.9109	0.9425	0.8659	0.7996	0.9055	0.7925	0.7376	0.7403	0.8651	0.7009	0.7021	0.697	0.7747	0.784	0.7214	0.651	0.671	0.7721	0.7145	0.5644	0.6055	0.5674	0.6448	0.5482	0.6701	0.5515	0.5974	0.6912	0.5892	0.6484	0.6403
GM2822	HBV	2.343	2.0026	1.855	1.5349	1.4325	1.475	1.3656	1.2505	1.2423	0.9957	1.0964	0.9886	1.0338	0.9218	0.9963	0.9548	0.9654	0.9254	0.9596	0.8997	0.8306	0.8808	0.7965	0.7638	0.788	0.8354	0.7454	0.7448	0.7263	0.7634	0.738	0.749	0.6914	0.7229	0.733	0.7291	0.6081	0.6298	0.6003	0.6423	0.5913	0.6661	0.5994	0.6262	0.6572	0.6092	0.5905	0.5992
GM2925	HBV	2.491	2.0333	1.8311	1.6179	1.5905	1.6166	1.5033	1.3323	1.3736	1.0397	1.1516	1.1193	1.061	1.0334	0.9754	1.063	0.984	0.9887	1.0018	0.938	0.9533	0.7601	0.7262	0.8346	0.7795	0.7412	0.8359	0.7869	0.7263	0.6948	0.6196	0.8024	0.7847	0.764	0.6236	0.7231	0.653	0.6251	0.7058	0.6872	0.6769	0.6448	0.6264	0.6503	0.6305	0.6443	0.4883	0.526
GM2935	HBV	2.6192	2.1542	1.8639	1.6762	1.6375	1.6079	1.5263	1.3862	1.3189	0.9993	1.158	1.1659	1.095	1.0119	0.8852	1.0397	0.9375	1.0165	0.9769	0.9357	0.9619	0.7124	0.7278	0.8598	0.7605	0.7097	0.8155	0.7456	0.7297	0.6983	0.6382	0.7917	0.7772	0.7447	0.6228	0.7022	0.6528	0.6041	0.7205	0.7166	0.6707	0.624	0.6121	0.6262	0.6011	0.5978	0.4859	0.5542
GM3067	HBV	2.5501	2.0974	1.8789	1.6503	1.5987	1.6316	1.4834	1.3494	1.3372	0.9908	1.1676	1.1318	1.0925	0.991	0.9275	1.0396	0.9527	0.9846	1.0416	0.9217	0.9245	0.7503	0.7223	0.8343	0.7591	0.7633	0.8279	0.7548	0.7353	0.7731	0.647	0.8235	0.7586	0.7483	0.6999	0.7119	0.622	0.6284	0.6968	0.6873	0.6472	0.6475	0.6124	0.6226	0.6587	0.5815	0.5492	0.5689
GM3071	HBV	2.3276	1.9582	1.8271	1.5296	1.4584	1.4982	1.3517	1.2753	1.3025	0.9572	1.1127	0.9772	1.0473	0.9559	0.9925	0.9257	0.979	0.9131	0.9901	0.9164	0.8572	0.9021	0.8055	0.7692	0.7957	0.8438	0.7187	0.7273	0.6888	0.7156	0.6857	0.7614	0.7023	0.7175	0.7382	0.7115	0.6163	0.6175	0.6084	0.6527	0.5929	0.6499	0.5837	0.6498	0.7109	0.6337	0.608	0.5507
GM3474	HBV	2.6073	2.1048	1.9719	1.6777	1.5461	1.6345	1.4965	1.3493	1.3533	0.9885	1.1966	1.0621	1.1467	1.0118	0.927	0.9194	0.9906	0.9994	0.9566	0.9898	0.8836	0.8239	0.8323	0.8032	0.8243	0.7575	0.6963	0.7069	0.6888	0.6909	0.6437	0.7332	0.7456	0.7479	0.6522	0.6588	0.6571	0.5724	0.6314	0.6883	0.5935	0.5986	0.6077	0.712	0.6325	0.5919	0.5053	0.5358
GM3987	HBV	2.094	1.6746	1.6425	1.3916	1.3599	1.4356	1.3047	1.1386	1.485	1.1409	1.0148	0.9301	0.9205	0.9974	1.2106	1.1361	1.1733	0.9662	1.0823	0.9606	0.9508	0.8903	0.787	0.7646	0.8385	0.7748	0.8404	0.8923	0.6794	0.6079	0.5806	0.8154	0.794	0.8434	0.5888	0.7077	0.7113	0.6758	0.6652	0.6795	0.6778	0.7028	0.6347	0.6765	0.7219	0.6951	0.4368	0.4679
GM3999	HBV	2.7688	2.1808	1.965	1.7507	1.5426	1.6391	1.5435	1.3865	1.3438	0.9559	1.204	1.1013	1.1917	1.106	0.834	0.8719	0.922	1.0077	0.9023	0.9923	0.9097	0.7721	0.8289	0.8307	0.8089	0.7202	0.653	0.6663	0.7107	0.7017	0.6793	0.6939	0.7677	0.7177	0.6611	0.6133	0.6666	0.5656	0.6477	0.6955	0.5914	0.5553	0.611	0.744	0.5819	0.549	0.4859	0.5658
TBR1372	HBV	1.9613	1.6947	1.639	1.2852	1.2606	1.2908	1.1695	1.0659	1.1992	1.0684	0.97	0.8393	0.8793	0.8478	1.2099	0.9935	1.0125	0.8205	0.9863	0.827	0.7872	1.0103	0.7484	0.6859	0.7413	0.9487	0.7867	0.8134	0.6975	0.7482	0.7743	0.7661	0.638	0.7103	0.7705	0.7805	0.5704	0.7233	0.5525	0.5773	0.5981	0.7417	0.5809	0.5657	0.7341	0.6859	0.7034	0.6002
TBR1015	HCC	2.7534	2.0704	1.9167	1.7394	1.6438	1.8177	1.6509	1.3826	1.5095	1.0683	1.2489	1.2234	1.1461	1.1467	0.9581	1.0464	1.0079	1.0625	1.0053	0.9957	1.0018	0.7234	0.7015	0.874	0.7851	0.7045	0.8144	0.7709	0.6987	0.6463	0.5463	0.7995	0.8526	0.7795	0.5639	0.6968	0.6754	0.6018	0.7608	0.7202	0.6889	0.6211	0.65	0.7174	0.6387	0.6668	0.4345	0.4518
TBR1373	HCC	2.1085	1.793	1.6916	1.3832	1.3589	1.3942	1.2561	1.1214	1.2406	1.0622	1.0132	0.92	0.9331	0.9055	1.1372	0.9849	0.977	0.8498	1.0294	0.842	0.8288	0.9427	0.7542	0.726	0.7402	0.9639	0.7784	0.7929	0.7016	0.7473	0.7449	0.8114	0.673	0.7063	0.7598	0.7347	0.5817	0.6932	0.589	0.5949	0.6144	0.7102	0.5889	0.5607	0.7152	0.6678	0.6841	0.5904
TBR1388	HCC	2.3548	2.182	1.2898	1.5244	1.6077	1.1377	1.4549	1.2861	1.0236	1.1037	0.7755	1.1846	0.9356	0.8959	0.7236	1.0407	0.8164	0.9449	0.8499	0.8308	0.9553	0.636	0.8383	0.9502	0.8216	0.6581	0.8465	0.7512	0.8496	0.911	0.7501	0.7673	0.7926	0.7845	0.7904	0.6127	0.7725	0.7019	0.7744	0.6352	0.729	0.541	0.7042	0.539	0.3707	0.508	0.6189	0.6688
TBR1555	HCC	2.0518	1.7957	1.6739	1.3678	1.3573	1.3462	1.2194	1.1297	1.2087	1.0481	0.9997	0.9048	0.9226	0.8693	1.1573	0.9731	0.9776	0.8396	0.9708	0.8279	0.8066	0.964	0.7445	0.7078	0.7416	0.9275	0.7885	0.7899	0.7026	0.7581	0.7631	0.7624	0.651	0.6955	0.7949	0.7746	0.5763	0.7036	0.5818	0.5907	0.6048	0.7202	0.5729	0.5616	0.7306	0.6488	0.7248	0.5934
TBR1586	HCC	2.337	1.9074	1.8268	1.5079	1.4413	1.5332	1.374	1.2311	1.3068	0.9903	1.109	1.0033	1.0279	0.943	1.0868	0.9863	1.0013	0.9081	1.0634	0.8952	0.854	0.9191	0.7553	0.7643	0.7664	0.9038	0.796	0.7823	0.6874	0.7162	0.666	0.8201	0.7091	0.7339	0.7181	0.7497	0.5962	0.6447	0.6298	0.6346	0.6028	0.7128	0.5931	0.6134	0.7365	0.646	0.5982	0.5213
TBR1644	HCC	1.9715	1.9945	1.1269	1.3323	1.494	0.9598	1.2292	1.2253	0.853	1.1559	0.6903	1.1192	0.8522	0.8114	0.5782	0.8845	0.6098	0.8052	0.6581	0.6526	0.8994	0.5162	0.8186	0.8947	0.7247	0.508	0.7402	0.6295	1.0029	0.8961	0.9574	0.5103	0.6907	0.6166	0.8292	0.5215	0.9072	0.6754	0.7458	0.5675	0.8455	0.4385	0.7852	0.4484	0.3069	0.3889	0.7579	0.7231
TBR1662	HCC	1.6465	1.8132	0.9237	1.122	1.3931	0.7965	1.0775	1.1003	0.713	1.2235	0.5559	1.0675	0.6894	0.6621	0.5382	0.9151	0.5591	0.6806	0.5815	0.5627	0.8583	0.4653	0.7826	0.8627	0.6749	0.445	0.8047	0.6358	1.1162	0.9646	1.0464	0.4844	0.628	0.58	0.8985	0.5143	0.9563	0.7124	0.7543	0.4998	0.9624	0.4142	0.8355	0.3487	0.2626	0.3973	0.8349	0.7386
TBR1676	HCC	1.6516	1.7626	0.8817	1.1158	1.3072	0.7479	1.0552	1.0334	0.762	1.3251	0.5159	0.9408	0.6996	0.6978	0.8011	0.9699	0.6534	0.7523	0.6345	0.6019	0.8204	0.6938	0.8804	0.8024	0.7776	0.6661	0.8721	0.7845	0.8925	0.9521	1.0591	0.5693	0.6341	0.6489	0.9726	0.6589	0.6953	0.8793	0.6607	0.524	0.7809	0.6033	0.7193	0.3524	0.2589	0.4955	0.9344	0.7799
TBR1677	HCC	2.0315	1.7455	1.5967	1.3294	1.285	1.2447	1.1783	1.0889	1.1269	1.0571	0.9302	0.8924	0.9021	0.8167	1.1477	0.9863	0.9468	0.8255	0.945	0.785	0.7868	0.9707	0.7086	0.701	0.6943	0.9587	0.8024	0.7874	0.744	0.8267	0.8631	0.7684	0.6265	0.6887	0.8331	0.7679	0.533	0.7584	0.5808	0.5885	0.598	0.7441	0.5555	0.5111	0.6891	0.6314	0.7808	0.654
TBR1723	HCC	1.9368	1.9458	1.0995	1.2677	1.4069	0.914	1.2018	1.1169	0.8267	1.2072	0.6489	1.0397	0.7959	0.7192	0.8423	1.017	0.6974	0.7958	0.7296	0.657	0.8229	0.7302	0.7903	0.8254	0.7301	0.7522	0.8913	0.7986	0.8932	0.9961	1.0299	0.6428	0.6593	0.6672	0.9713	0.7185	0.6228	0.8393	0.6673	0.5494	0.7285	0.6681	0.6746	0.3663	0.3346	0.4943	0.9243	0.789
TBR1757	HCC	1.2973	1.4976	0.6768	0.8968	1.1509	0.5922	0.908	0.8633	0.6938	1.4804	0.3946	0.8599	0.5413	0.6333	0.782	1.0027	0.6334	0.6597	0.5994	0.5354	0.7925	0.6294	0.8789	0.8047	0.7711	0.5875	0.9277	0.8389	0.9958	0.9199	1.104	0.5302	0.6283	0.6665	0.9121	0.6094	0.8534	0.9549	0.6837	0.4533	0.9092	0.5522	0.8263	0.3292	0.2184	0.4872	0.9066	0.7714
TBR1772	HCC	1.9565	1.7292	1.6751	1.3172	1.2853	1.3111	1.1954	1.0934	1.2377	1.0437	0.9846	0.8554	0.9005	0.8916	1.1743	0.9479	1.0172	0.83	0.9648	0.8753	0.8076	1.0131	0.8147	0.7203	0.784	0.9261	0.7564	0.7852	0.6855	0.7083	0.7646	0.7529	0.6585	0.7155	0.7362	0.7448	0.588	0.6845	0.5698	0.5798	0.5966	0.7048	0.5979	0.605	0.7288	0.6825	0.6543	0.5602
TBR1774	HCC	2.0091	1.8014	1.7253	1.3525	1.2899	1.2844	1.1622	1.1309	1.1705	0.9462	0.9947	0.8267	0.9294	0.8368	1.0905	0.8631	0.9956	0.8239	0.9452	0.8779	0.7524	1.0638	0.8617	0.7022	0.7999	0.9548	0.6808	0.7191	0.6915	0.7337	0.8166	0.7299	0.6083	0.6878	0.7969	0.7232	0.5802	0.6475	0.5229	0.5779	0.5336	0.6725	0.5627	0.6236	0.7357	0.6341	0.7097	0.609
TBR1828	HCC	2.0851	1.81	1.6729	1.3695	1.356	1.3607	1.2425	1.1444	1.1974	1.0358	1.0215	0.9234	0.9316	0.8792	1.1569	0.9867	0.9657	0.8507	0.9757	0.8111	0.8338	0.9588	0.7189	0.7228	0.711	0.9483	0.8105	0.7985	0.684	0.7405	0.7408	0.7751	0.6582	0.703	0.775	0.7781	0.5588	0.6888	0.5959	0.6009	0.6093	0.7435	0.5688	0.5437	0.7461	0.6488	0.7133	0.5704
TBR1838	HCC	1.6914	1.4125	1.3926	1.097	1.0598	1.0772	0.9837	0.9217	1.2264	1.1202	0.8291	0.6472	0.775	0.815	1.1796	0.8845	1.138	0.827	0.9382	0.8422	0.7368	1.0918	0.9183	0.632	0.8912	0.8431	0.5815	0.8255	0.7242	0.6417	0.7762	0.6476	0.6266	0.7568	0.629	0.6961	0.7004	0.7555	0.4591	0.5503	0.5859	0.6533	0.5566	0.6335	0.7004	0.7791	0.5454	0.5698
TBR1850	HCC	2.1209	1.786	1.7248	1.3757	1.3657	1.4493	1.3005	1.0929	1.245	1.0483	1.0297	0.9742	0.8989	0.8921	1.1899	1.0455	1.0098	0.8678	1.0169	0.8376	0.8242	0.9411	0.6976	0.739	0.7308	0.9458	0.8846	0.8448	0.7267	0.7684	0.7566	0.8233	0.6897	0.7388	0.7254	0.7957	0.5709	0.7032	0.6299	0.5832	0.6265	0.7799	0.6034	0.5527	0.7434	0.6423	0.6562	0.5656
TBR1861	HCC	1.6567	1.3992	1.3709	1.0813	1.0532	1.0907	0.9975	0.9049	1.2125	1.0596	0.8219	0.6535	0.7339	0.7755	1.3061	0.846	1.2417	0.7819	0.9991	0.8512	0.6729	1.2263	0.9643	0.5946	0.9478	0.8847	0.6245	0.8198	0.7691	0.5946	0.7942	0.7217	0.6064	0.8111	0.5781	0.6779	0.739	0.7142	0.4512	0.4916	0.5337	0.698	0.5743	0.6673	0.6893	0.7464	0.512	0.5612
TBR1886	HCC	2.0423	1.7562	1.6244	1.3441	1.3281	1.3266	1.2075	1.1118	1.1692	1.0368	0.9868	0.9102	0.8994	0.8471	1.1758	1.0027	0.9482	0.8292	0.9775	0.787	0.8128	0.9434	0.6846	0.7134	0.6857	0.9613	0.8221	0.8035	0.7064	0.7853	0.7885	0.7727	0.6432	0.685	0.8033	0.7902	0.537	0.747	0.5917	0.5848	0.6098	0.7515	0.563	0.5186	0.738	0.6347	0.7613	0.6087
TBR1899	HCC	2.0953	1.7982	1.6428	1.3591	1.3498	1.3562	1.2714	1.1013	1.2	1.0776	0.9832	0.9482	0.8962	0.8639	1.1657	1.0258	0.9907	0.8503	0.9882	0.8305	0.817	0.9601	0.737	0.7343	0.7426	0.9504	0.8619	0.8362	0.7259	0.7763	0.7678	0.8179	0.6787	0.7337	0.7553	0.7889	0.587	0.728	0.6144	0.5771	0.6263	0.7649	0.6027	0.5341	0.6944	0.6527	0.6925	0.5765
TBR1916	HCC	2.1133	1.8288	1.7033	1.4053	1.4069	1.3951	1.2615	1.1667	1.2169	1.0354	1.0289	0.9441	0.9418	0.9055	1.1374	1.0032	0.971	0.8659	0.998	0.8178	0.8555	0.9353	0.7156	0.7294	0.7201	0.9367	0.8203	0.794	0.6896	0.7441	0.7171	0.7889	0.669	0.7071	0.7853	0.7445	0.5716	0.6811	0.6067	0.6174	0.6217	0.7374	0.5725	0.5554	0.7449	0.6426	0.7128	0.5757
TBR1920	HCC	2.1523	1.8338	1.7476	1.395	1.3811	1.4653	1.3104	1.1153	1.2381	1.0344	1.0506	0.9893	0.91	0.8719	1.1722	1.034	0.9795	0.8756	1.0258	0.8274	0.8213	0.9392	0.6808	0.7449	0.7145	0.9803	0.8732	0.828	0.7382	0.7971	0.7697	0.8288	0.6879	0.7229	0.7715	0.801	0.5478	0.7182	0.6274	0.5946	0.6152	0.7853	0.5917	0.5438	0.7639	0.6239	0.7205	0.5863
TBR1932	HCC	1.9416	1.6515	1.6154	1.2788	1.2382	1.2801	1.1704	1.0484	1.2003	1.04	0.9467	0.8396	0.8616	0.8314	1.2176	0.9643	1.0069	0.8168	0.9921	0.8395	0.7714	1.0315	0.7686	0.6964	0.756	0.9776	0.785	0.8052	0.6995	0.746	0.823	0.7682	0.6393	0.7105	0.7571	0.7277	0.5768	0.7185	0.5672	0.5559	0.5936	0.7242	0.5818	0.5851	0.7296	0.6637	0.7026	0.5955
TBR2000	HCC	1.7471	1.4914	1.3924	1.1532	1.15	1.1035	1.068	0.9471	1.2269	1.1431	0.7892	0.7317	0.7661	0.8659	1.22	0.924	1.1117	0.8237	0.9131	0.8874	0.7486	1.09	0.9415	0.6625	0.9176	0.8622	0.6986	0.821	0.7289	0.6966	0.7964	0.7118	0.6505	0.7641	0.6874	0.689	0.7015	0.7327	0.5215	0.5389	0.6026	0.6797	0.6181	0.6618	0.5962	0.7671	0.5966	0.5698
TBR2038	HCC	1.9192	1.6721	1.5719	1.2585	1.2851	1.2358	1.1637	1.0329	1.1529	1.0466	0.8851	0.8523	0.8286	0.8649	1.1435	0.997	1.0021	0.8193	1.0764	0.8251	0.8136	0.9967	0.7598	0.7107	0.7467	1.0135	0.8041	0.8006	0.7619	0.7315	0.8228	0.851	0.6455	0.7382	0.7582	0.768	0.5827	0.7402	0.5778	0.5632	0.6126	0.7249	0.5976	0.5557	0.6769	0.6587	0.6928	0.6184
TBR2080	HCC	2.0775	1.7756	1.6682	1.3792	1.4275	1.4023	1.273	1.1111	1.1858	1.031	1.0071	0.9705	0.8936	0.9167	1.1459	1.0158	0.9482	0.8363	0.9787	0.7941	0.8418	0.8959	0.6545	0.7169	0.6799	0.9199	0.8527	0.8077	0.722	0.8018	0.7486	0.7849	0.6661	0.6944	0.7953	0.8006	0.5512	0.7175	0.6095	0.5903	0.6227	0.7543	0.5803	0.5178	0.7126	0.6461	0.725	0.6156
TBR2083	HCC	1.8486	1.7227	1.2565	1.2227	1.2886	1.0411	1.1694	1.0226	1.0764	1.2662	0.7126	0.8947	0.7811	0.7999	1.0927	1.0902	0.9169	0.8404	0.8902	0.786	0.8173	0.8832	0.8424	0.7555	0.817	0.8565	0.8837	0.877	0.7994	0.8257	0.8665	0.7407	0.6857	0.7506	0.803	0.7581	0.6368	0.8304	0.6178	0.5719	0.7072	0.7265	0.666	0.4951	0.4666	0.6438	0.7213	0.6506
TBR846	HCC	1.8951	1.6362	1.5985	1.2621	1.2508	1.3092	1.1799	1.01	1.2795	1.149	0.9405	0.8549	0.8375	0.8359	1.3445	1.1216	1.0993	0.8411	1.1127	0.84	0.805	1.0063	0.7365	0.6946	0.7556	0.9762	0.8759	0.9069	0.7076	0.7254	0.743	0.8315	0.6768	0.7764	0.7255	0.8154	0.5961	0.7733	0.5815	0.5745	0.6314	0.7961	0.6074	0.5663	0.7715	0.6888	0.6516	0.5598
TBR852	HCC	1.8498	1.6243	1.6059	1.2384	1.1906	1.223	1.1138	1.0157	1.2337	1.0868	0.9176	0.7806	0.8459	0.8269	1.2395	0.9399	1.0901	0.8143	0.9551	0.8967	0.7371	1.0758	0.8828	0.6786	0.8405	0.9132	0.7311	0.815	0.6952	0.7022	0.7905	0.7377	0.6351	0.7368	0.7106	0.7318	0.6368	0.713	0.5249	0.5468	0.5871	0.7067	0.6128	0.6351	0.7079	0.7202	0.6294	0.561
TBR853	HCC	1.8015	1.5349	1.5293	1.201	1.1961	1.218	1.1134	0.9701	1.27	1.1007	0.8816	0.779	0.7998	0.8676	1.2883	0.9404	1.1084	0.8082	0.9363	0.8973	0.7551	1.0679	0.872	0.6725	0.8656	0.8771	0.7389	0.8548	0.7022	0.6802	0.7617	0.7226	0.66	0.7497	0.6709	0.7328	0.6653	0.7144	0.5371	0.5321	0.6052	0.6975	0.609	0.6399	0.6659	0.7629	0.5987	0.5369
TBR855	HCC	1.285	1.3477	0.614	0.8462	1.0859	0.5601	0.9003	0.8243	0.7369	1.6311	0.3873	0.8084	0.5245	0.6861	0.7991	0.9502	0.7417	0.6867	0.5537	0.5861	0.8269	0.6717	1.085	0.8196	0.9501	0.4791	0.7839	0.8946	0.9853	0.6958	0.9596	0.4468	0.6888	0.7495	0.633	0.517	1.1836	0.8536	0.6791	0.4199	0.964	0.515	0.9502	0.3795	0.2035	0.5251	0.5748	0.5603
TBR858	HCC	1.9091	1.6579	1.5977	1.2779	1.2695	1.2745	1.1672	1.0548	1.241	1.121	0.9378	0.8381	0.8666	0.8851	1.1978	0.9826	1.0016	0.8287	0.9501	0.8533	0.8118	0.9751	0.7792	0.7035	0.7708	0.8943	0.7659	0.8236	0.7064	0.7379	0.7736	0.7249	0.6665	0.7126	0.7472	0.7488	0.5892	0.7607	0.5703	0.5718	0.6323	0.6998	0.6008	0.583	0.6904	0.695	0.682	0.5785
TBR874	HCC	1.7478	1.4952	1.5434	1.1631	1.1412	1.1901	1.0816	0.9577	1.2371	1.0746	0.886	0.7552	0.7885	0.8411	1.329	1.0201	1.1051	0.8118	1.0329	0.883	0.7796	1.1162	0.836	0.6878	0.8096	1.0053	0.8012	0.8697	0.6833	0.6623	0.7758	0.787	0.6474	0.7626	0.6848	0.7082	0.6089	0.7264	0.5505	0.5475	0.5945	0.7616	0.611	0.6037	0.76	0.7401	0.6039	0.5369
TBR931	HCC	2.2214	2.1753	1.2075	1.423	1.4735	1.0172	1.33	1.27	0.8721	1.1424	0.7312	1.1635	0.9349	0.8189	0.6442	0.8946	0.6744	0.8458	0.6862	0.7182	0.8659	0.6244	0.9279	0.929	0.7999	0.5874	0.7706	0.6897	0.9076	0.9018	0.9548	0.5809	0.72	0.6723	0.8404	0.5568	0.783	0.6712	0.7305	0.5845	0.743	0.5098	0.7504	0.4741	0.3248	0.4652	0.7087	0.7197
TBR964	HCC	2.6502	2.1144	1.8507	1.7148	1.4891	1.4901	1.4631	1.3649	1.3423	1.0206	1.1198	1.0151	1.2077	1.1346	0.8068	0.8089	0.9502	1.0141	0.9209	1.0171	0.8695	0.7849	0.988	0.8161	0.9179	0.67	0.5779	0.6462	0.6623	0.6206	0.6503	0.6476	0.7597	0.7233	0.5934	0.5702	0.7468	0.5291	0.6039	0.6861	0.5821	0.5095	0.6232	0.8032	0.5058	0.6401	0.4543	0.5416
TBR1045	HNSCC	2.0587	1.8217	1.7141	1.3726	1.3179	1.3597	1.2141	1.1483	1.219	0.9732	1.02	0.8626	0.9487	0.8325	1.0924	0.8958	0.9907	0.8335	0.9849	0.8616	0.7593	1.0057	0.7941	0.7137	0.7764	0.9652	0.6835	0.7257	0.7356	0.7875	0.8106	0.7371	0.6355	0.7073	0.803	0.7771	0.5503	0.7235	0.53	0.5776	0.5449	0.687	0.57	0.6023	0.745	0.5853	0.7471	0.6165
TBR1046	HNSCC	2.2017	1.9249	1.8152	1.4529	1.3866	1.4298	1.2704	1.1868	1.2072	0.924	1.0585	0.913	0.9944	0.835	1.0922	0.8853	0.9782	0.8397	0.9899	0.8752	0.7581	1.0108	0.7817	0.7301	0.7631	0.9985	0.7025	0.7216	0.7223	0.7992	0.8055	0.7524	0.634	0.6975	0.8184	0.7715	0.5445	0.6835	0.5406	0.5809	0.5333	0.7015	0.5629	0.6043	0.745	0.5655	0.7658	0.6198
TBR1057	HNSCC	2.2293	1.946	1.7826	1.4736	1.4138	1.4234	1.2637	1.2302	1.2071	0.9432	1.0692	0.9266	1.0254	0.8227	1.071	0.8826	0.9727	0.8595	0.9928	0.8484	0.779	1.003	0.7612	0.7261	0.7448	0.9889	0.6724	0.7014	0.7334	0.8017	0.7961	0.7473	0.6335	0.6939	0.8386	0.7901	0.5407	0.7224	0.5452	0.6006	0.5276	0.7065	0.5471	0.5626	0.7617	0.5524	0.7958	0.6071
TBR1059	HNSCC	2.1042	1.852	1.7322	1.4028	1.3421	1.3655	1.2186	1.1761	1.223	0.9648	1.0284	0.8772	0.9711	0.8203	1.1062	0.9038	1.0083	0.8533	0.9862	0.8701	0.752	1.0232	0.8061	0.7134	0.7857	0.964	0.6857	0.7324	0.7245	0.7722	0.8025	0.7425	0.6358	0.7095	0.7986	0.7668	0.5619	0.7007	0.5401	0.5911	0.5388	0.6945	0.5669	0.6041	0.7516	0.5206	0.7298	0.6167
TBR1070	HNSCC	2.1625	1.8952	1.7801	1.436	1.3791	1.4048	1.2587	1.1926	1.2198	0.9687	1.0582	0.9043	0.9865	0.8492	1.0909	0.91	0.9762	0.8587	0.9746	0.8579	0.7794	0.9888	0.771	0.7186	0.756	0.9569	0.7038	0.7349	0.7187	0.7866	0.7874	0.7444	0.6454	0.6988	0.8156	0.7822	0.548	0.7002	0.5515	0.5994	0.5544	0.6968	0.5663	0.5833	0.7393	0.5903	0.7575	0.6167
TBR929	HNSCC	2.2327	1.9739	1.8218	1.4709	1.3985	1.4076	1.2614	1.2388	1.1728	0.8916	1.0806	0.9102	1.0328	0.8196	1.0449	0.8576	0.9712	0.8369	0.9787	0.8744	0.7365	1.0422	0.8078	0.7296	0.766	1.0176	0.6693	0.6921	0.7011	0.7891	0.8015	0.7485	0.611	0.6948	0.8175	0.7852	0.5454	0.6613	0.5204	0.5814	0.5093	0.6975	0.5588	0.596	0.7631	0.5604	0.7867	0.5876
TBR934	HNSCC	2.171	1.9063	1.7567	1.4483	1.3956	1.3765	1.2358	1.2157	1.1765	0.8951	1.0538	0.8933	1.0126	0.811	1.0365	0.8366	0.962	0.8379	0.9736	0.8434	0.7765	1.0159	0.7763	0.7169	0.745	0.9981	0.6233	0.67	0.7156	0.7935	0.7962	0.7208	0.6163	0.6779	0.8491	0.782	0.5296	0.6984	0.5228	0.5937	0.5106	0.6817	0.537	0.5631	0.7571	0.5711	0.8007	0.6109
TBR947	HNSCC	2.0816	1.8483	1.7497	1.3868	1.331	1.3542	1.2084	1.1555	1.1884	0.8916	1.0143	0.8646	0.95	0.823	1.0539	0.8424	0.9665	0.849	0.9756	0.8647	0.7586	1.0242	0.7966	0.716	0.7657	0.9987	0.6453	0.6787	0.7275	0.7943	0.8293	0.7278	0.6184	0.6849	0.8367	0.7653	0.5291	0.6956	0.5313	0.5853	0.5062	0.684	0.5513	0.6047	0.7587	0.5621	0.7837	0.6379
TBR956	HNSCC	2.1276	1.8876	1.7229	1.4263	1.4191	1.383	1.2545	1.2009	1.1908	0.9914	1.0318	0.9269	0.9717	0.8702	1.1161	0.9756	0.9642	0.8397	1.029	0.8259	0.8062	0.9644	0.725	0.7219	0.719	0.9847	0.745	0.76	0.7138	0.7767	0.7577	0.7732	0.646	0.7038	0.8117	0.8274	0.5413	0.7233	0.558	0.5947	0.574	0.7246	0.5711	0.5506	0.7459	0.6131	0.7698	0.5969
TBR963	HNSCC	2.2186	1.9467	1.796	1.4712	1.4111	1.4137	1.2581	1.2311	1.1874	0.8975	1.0683	0.9166	1.0203	0.8177	1.0334	0.8403	0.9605	0.8601	0.976	0.8541	0.778	1.0144	0.7673	0.729	0.7409	1.0034	0.6412	0.6765	0.7313	0.8045	0.8163	0.7341	0.6292	0.6824	0.86	0.7815	0.5259	0.7162	0.5412	0.6031	0.5101	0.6947	0.5412	0.5625	0.7649	0.5317	0.8182	0.6171
TBR202	LC	2.3728	2.1178	1.9063	1.5596	1.3992	1.4089	1.2552	1.3073	1.1203	0.8488	1.116	0.9052	1.1211	0.7647	0.9333	0.7618	0.9094	0.8532	0.9292	0.868	0.6966	1.0304	0.8299	0.7226	0.7497	0.9897	0.5678	0.6131	0.7287	0.8477	0.8807	0.6929	0.5754	0.6482	0.9012	0.7544	0.5053	0.6713	0.4861	0.6017	0.4628	0.6536	0.5286	0.575	0.7541	0.5082	0.8686	0.6589
TBR204	LC	2.1726	1.9025	1.7503	1.4579	1.3941	1.3632	1.2269	1.207	1.2027	0.97	1.0435	0.8898	1.0149	0.8266	1.0824	0.8734	0.9827	0.8476	0.9621	0.8599	0.742	1.0072	0.8122	0.7056	0.7741	0.9227	0.6561	0.719	0.7259	0.7765	0.7973	0.7094	0.6247	0.6885	0.8185	0.7571	0.5678	0.7117	0.5224	0.5916	0.5363	0.6748	0.5649	0.5862	0.7194	0.5357	0.7569	0.6218
TBR268	LC	2.1766	1.8983	1.7645	1.4134	1.3491	1.3994	1.2375	1.167	1.2083	0.986	1.0506	0.9032	0.9727	0.8055	1.0879	0.8992	0.9747	0.8307	0.9721	0.8531	0.7262	0.9938	0.7686	0.7145	0.753	0.9527	0.681	0.7311	0.751	0.8348	0.8275	0.7261	0.6248	0.6902	0.8229	0.803	0.5439	0.7385	0.5198	0.573	0.5389	0.7016	0.5745	0.564	0.7395	0.5987	0.8005	0.6303
TBR286	LC	2.3596	2.0672	1.901	1.5368	1.3791	1.4182	1.2707	1.2773	1.1418	0.8609	1.1248	0.8996	1.1099	0.7795	0.9548	0.7865	0.9169	0.8591	0.9253	0.8609	0.6956	1.0095	0.8194	0.7215	0.7507	0.9636	0.5917	0.6323	0.7324	0.8632	0.8714	0.6887	0.5882	0.6537	0.882	0.7418	0.506	0.658	0.4918	0.6039	0.4719	0.6517	0.5279	0.5918	0.7441	0.5214	0.8302	0.681
TBR300	LC	2.3643	2.0345	1.8857	1.5276	1.3924	1.4609	1.2968	1.2413	1.179	0.9052	1.1166	0.9476	1.0744	0.7917	1.0409	0.8674	0.9422	0.8571	0.9633	0.8597	0.7042	0.9936	0.7783	0.7195	0.7407	0.9796	0.6876	0.6979	0.7454	0.8532	0.8577	0.7461	0.6136	0.6743	0.8526	0.7722	0.5219	0.6842	0.5306	0.5888	0.5094	0.7049	0.5515	0.5768	0.7531	0.5224	0.8074	0.6546
TBR301	LC	2.2615	1.9959	1.8392	1.4932	1.3857	1.3971	1.2546	1.2563	1.1505	0.8914	1.0913	0.8947	1.0542	0.7818	1.0024	0.8188	0.9383	0.8532	0.9307	0.8595	0.7132	1.0208	0.8127	0.7135	0.761	0.9665	0.6236	0.6664	0.7202	0.8203	0.8359	0.6999	0.6018	0.6707	0.8681	0.768	0.5299	0.6736	0.505	0.6004	0.4998	0.671	0.5416	0.5812	0.7402	0.4911	0.8161	0.6451
TBR321	LC	2.2781	2.0942	1.9524	1.5093	1.3093	1.3299	1.1874	1.2757	1.0916	0.8048	1.0961	0.8201	1.105	0.7699	0.8919	0.7186	0.8828	0.8209	0.8678	0.8878	0.644	1.0365	0.929	0.6986	0.7893	0.924	0.5292	0.5933	0.7211	0.8542	0.961	0.6428	0.5491	0.6197	0.9025	0.7023	0.5024	0.6149	0.4454	0.5813	0.4437	0.5951	0.5164	0.6347	0.7164	0.5254	0.8428	0.7508
TBR357	LC	2.1286	1.8544	1.6894	1.4205	1.368	1.3244	1.1985	1.1909	1.1488	0.9243	1.0203	0.8738	0.9881	0.7905	1.0645	0.8686	0.9663	0.8464	0.9636	0.8118	0.7623	0.9945	0.7517	0.6919	0.7193	0.9534	0.6411	0.7054	0.7309	0.8052	0.8137	0.7066	0.6092	0.6767	0.8561	0.7826	0.5319	0.7318	0.5156	0.6	0.5216	0.7005	0.5334	0.5239	0.7539	0.5619	0.8022	0.6508
TBR377	LC	2.255	2.0161	1.8545	1.4867	1.3107	1.3178	1.1742	1.2456	1.1421	0.9005	1.0691	0.8241	1.0883	0.759	1.0062	0.8035	0.9645	0.8395	0.9353	0.8791	0.6769	1.0704	0.9045	0.6911	0.7891	0.9478	0.5832	0.6611	0.7197	0.7995	0.8826	0.6892	0.5709	0.6682	0.8673	0.722	0.5419	0.6566	0.4662	0.5983	0.4772	0.6442	0.5295	0.6114	0.7552	0.5519	0.7989	0.6754
TBR408	LC	2.1803	1.9194	1.7669	1.4401	1.2845	1.2809	1.151	1.2111	1.1332	0.9066	1.0495	0.7985	1.0624	0.7649	0.9511	0.758	0.9375	0.8279	0.8899	0.8665	0.6726	1.0208	0.9029	0.6951	0.794	0.8997	0.529	0.6425	0.7206	0.8034	0.8665	0.6252	0.5696	0.6524	0.8356	0.7208	0.5446	0.6875	0.4495	0.5851	0.4848	0.6113	0.5358	0.6051	0.7249	0.5364	0.7783	0.6798
TBR2641	NPC	2.2501	2.0071	1.8455	1.46	1.3055	1.3072	1.1645	1.2357	1.0897	0.8609	1.075	0.8088	1.0724	0.7575	0.9187	0.7157	0.932	0.818	0.8796	0.866	0.6526	1.0656	0.9044	0.6912	0.783	0.9496	0.5153	0.6037	0.6979	0.8082	0.8776	0.6428	0.5467	0.6394	0.8564	0.7143	0.5579	0.6338	0.4362	0.5798	0.4593	0.6142	0.5344	0.6107	0.7379	0.5482	0.818	0.6586
TBR2682	NPC	2.1921	1.9119	1.7487	1.4394	1.405	1.3943	1.2549	1.2072	1.1728	0.9645	1.0525	0.9293	0.9981	0.8304	1.0991	0.9322	0.9568	0.8511	1.0168	0.8234	0.7729	0.9788	0.7303	0.7167	0.712	0.9857	0.7297	0.7398	0.7203	0.8015	0.7899	0.7624	0.6333	0.6904	0.8246	0.8011	0.5351	0.7099	0.5553	0.5972	0.5556	0.7306	0.562	0.5427	0.7581	0.5507	0.7858	0.6093
TBR2699	NPC	2.0721	1.8198	1.7009	1.3801	1.34	1.3354	1.2048	1.1511	1.1981	0.9942	1.0094	0.8871	0.9595	0.8417	1.1081	0.9074	0.9777	0.8395	0.9557	0.8469	0.7739	0.9964	0.7764	0.7141	0.7512	0.9435	0.7045	0.7393	0.727	0.7816	0.8078	0.7337	0.6359	0.6914	0.7873	0.7662	0.5568	0.7171	0.5513	0.585	0.564	0.706	0.5762	0.5637	0.7337	0.5788	0.7403	0.6151
TBR2709	NPC	2.1031	1.8335	1.7122	1.3891	1.3356	1.3547	1.2076	1.1571	1.2003	0.9592	1.0213	0.8803	0.9647	0.8031	1.129	0.9084	1.0128	0.846	0.9881	0.8532	0.742	1.0347	0.784	0.7059	0.7651	0.9819	0.7078	0.7401	0.7352	0.7913	0.8199	0.7554	0.6276	0.7104	0.8016	0.7781	0.5624	0.7216	0.542	0.5814	0.5401	0.7201	0.5604	0.5754	0.7604	0.5405	0.753	0.6107
TBR2727	NPC	2.1041	1.8285	1.7164	1.387	1.3231	1.3591	1.2147	1.1551	1.1981	0.9607	1.0256	0.8813	0.9663	0.8084	1.1245	0.9183	1.0079	0.8482	0.985	0.8523	0.7379	1.0278	0.786	0.7078	0.7645	0.9794	0.7172	0.7444	0.7394	0.7893	0.8245	0.7545	0.6313	0.7123	0.796	0.7789	0.5565	0.719	0.5426	0.5829	0.5412	0.721	0.5665	0.5823	0.7598	0.5632	0.7456	0.612
TBR2847	NPC	2.1417	1.8676	1.7391	1.401	1.3358	1.3697	1.2114	1.1596	1.2019	1.0034	1.0329	0.8866	0.9791	0.7907	1.1344	0.9447	1.0073	0.8447	1.0057	0.8344	0.7413	1.0073	0.7553	0.7031	0.7392	0.9828	0.7209	0.7589	0.7345	0.806	0.8077	0.7588	0.6269	0.7137	0.8181	0.7949	0.5503	0.7353	0.5347	0.5862	0.5524	0.7278	0.5611	0.5556	0.7743	0.5219	0.7764	0.6138
TBR2849	NPC	2.5889	2.3714	2.0767	1.6683	1.401	1.3265	1.2095	1.4344	0.9626	0.7227	1.18	0.8547	1.2534	0.7152	0.7689	0.6409	0.8	0.8334	0.8425	0.8665	0.6353	1.0478	0.9303	0.7242	0.7203	0.9745	0.4625	0.5145	0.7052	0.8995	0.9908	0.6233	0.4969	0.5707	1.0207	0.669	0.4604	0.5703	0.4196	0.6293	0.3904	0.5741	0.4614	0.5529	0.7399	0.4505	0.9791	0.797
TBR2868	NPC	2.2288	1.9743	1.8309	1.4718	1.359	1.3622	1.2207	1.2427	1.1634	0.8937	1.0736	0.8614	1.051	0.7881	1.0266	0.8245	0.9828	0.8388	0.9529	0.8833	0.714	1.0764	0.8736	0.713	0.7938	0.9852	0.6175	0.6769	0.712	0.782	0.8432	0.7139	0.5943	0.689	0.8344	0.7409	0.5562	0.6506	0.4923	0.5899	0.4938	0.6689	0.5481	0.6058	0.7618	0.537	0.7766	0.6235
TBR2892	NPC	2.2766	1.9723	1.8191	1.4766	1.3945	1.4284	1.2723	1.2088	1.1475	0.9188	1.0794	0.9481	1.0258	0.7956	1.0657	0.9066	0.9519	0.8473	0.9888	0.8358	0.7355	0.9946	0.7391	0.7222	0.7091	1.0102	0.7236	0.7239	0.739	0.8514	0.8442	0.7721	0.6166	0.6898	0.8435	0.7851	0.5232	0.7001	0.5477	0.5843	0.5284	0.726	0.5548	0.539	0.7671	0.5169	0.8115	0.6431
TBR2906	NPC	2.096	1.8711	1.7319	1.3969	1.3392	1.3606	1.2226	1.1606	1.1901	0.9703	1.0227	0.8769	0.9679	0.8232	1.0863	0.8948	0.9726	0.8438	1.0293	0.8403	0.7574	1.006	0.7658	0.72	0.7478	1.0869	0.6823	0.7197	0.7135	0.7827	0.8087	0.7576	0.6247	0.6928	0.8124	0.7917	0.5485	0.7103	0.5362	0.5838	0.5469	0.6978	0.5668	0.574	0.7468	0.5902	0.781	0.6167
[truncated: 208 more columns]
