# Supplementary material for: Plasma DNA End-Motif Profiling as a Fragmentomic Marker in Cancer, Pregnancy, and Transplantation
Source: Oxford University Press journal article supplement (doi:10.1158/2159-8290.cd-19-0622), 2020-02-28
Supplement: 21598290cd190622-sup-223099_3_supp_6113226_q65mdd.xlsx [file 21598290cd190622-sup-223099_3_supp_6113226_q65mdd.xlsx]

## Sheet: TableS2
Table S2. The motif frequencies of shared and fetal-specific DNA molecules.
Sample ID	Group	GGTG	TAAG	ATCG	GAAG	CAAT	GCGT	GTAA	GTTG	CTCC	ACAA	GCGG	TTAA	AACG	CTGC	TCGA	ACCA	GGTT	CTTA	CGGC	CATA	CTTT	GGAC	TTCC	AAAA	CTCT	ACTT	TCAA	GGTC	ATTC	CCTA	GTGT	AGTA	TCCC	TCAG	GAGT	CCCT	GGAT	GAGA	ACTA	TAGC	CGAC	AGCG	AATC	GAAA	ATCC	TGTG	AGGC	ACCG
M11518_f	Fetal-specific	0.429981	0.504806	0.0105387	0.497429	0.664995	0.0453166	0.209721	0.160189	0.33724	0.521668	0.0347778	0.346725	0.0453166	0.372018	0.0295085	0.474243	0.466866	0.494267	0.0727173	0.592277	0.82413	0.295085	0.105387	1.12765	0.43525	0.418388	0.525883	0.347778	0.122249	0.964295	0.148596	0.192859	0.42155	0.462651	0.167566	1.59978	0.399418	0.315108	0.251876	0.227637	0.0389933	0.0326701	0.131734	0.887362	0.0790406	0.898955	0.199182	0.0579631
M11537_f	Fetal-specific	0.487292	0.547351	0.0163796	0.510497	0.683847	0.038219	0.210204	0.17335	0.294832	0.515956	0.0532336	0.36308	0.0423139	0.36308	0.0245694	0.498212	0.455898	0.503672	0.0655183	0.614234	0.831263	0.289372	0.152876	1.03601	0.435424	0.413584	0.511862	0.320767	0.135131	0.995059	0.161066	0.20338	0.449073	0.526876	0.17881	1.64888	0.375365	0.348066	0.237504	0.256613	0.0559635	0.0327591	0.143321	0.849008	0.077803	0.93227	0.19519	0.0491387
M11549_f	Fetal-specific	0.560194	0.532568	0.013813	0.503407	0.672233	0.0445086	0.194917	0.194917	0.270121	0.492664	0.0306956	0.336116	0.0383695	0.290073	0.0399042	0.461968	0.458899	0.486525	0.0521825	0.686046	0.851802	0.287003	0.145804	1.14187	0.437412	0.418994	0.41439	0.340721	0.128921	0.900915	0.155013	0.250169	0.458899	0.460433	0.197986	1.56087	0.380625	0.362208	0.270121	0.251704	0.0460433	0.041439	0.144269	0.923936	0.0844128	0.959236	0.187243	0.0675302
M11570_f	Fetal-specific	0.472949	0.495918	0.0167046	0.470861	0.73709	0.0261009	0.206719	0.166002	0.297551	0.516799	0.0313211	0.348709	0.0438496	0.328872	0.0428055	0.432232	0.491742	0.468773	0.0709946	0.636863	0.898916	0.282934	0.12424	1.08267	0.416571	0.409263	0.511578	0.314255	0.126329	0.888476	0.167046	0.238041	0.412395	0.490698	0.204631	1.51803	0.417615	0.373765	0.251613	0.245349	0.0574221	0.0354973	0.175398	0.918753	0.105448	1.00541	0.194191	0.0480257
M11714_f	Fetal-specific	0.422485	0.559845	0.0145685	0.48284	0.662865	0.0270557	0.182106	0.196674	0.306978	0.605632	0.0228933	0.363171	0.0478678	0.348602	0.0364212	0.4818	0.460988	0.48284	0.0676393	0.618119	0.903245	0.233095	0.11967	1.22895	0.411039	0.405836	0.506774	0.297613	0.110304	0.906366	0.152969	0.235177	0.394389	0.51718	0.169619	1.60773	0.43081	0.369415	0.227892	0.252867	0.0593144	0.0322587	0.147766	0.877229	0.0926138	0.92926	0.193552	0.0749235
M11842_f	Fetal-specific	0.495235	0.613967	0.012498	0.503046	0.634276	0.0484299	0.224965	0.157788	0.249961	0.507733	0.0234338	0.343696	0.0468677	0.303078	0.0453054	0.453054	0.468677	0.459303	0.0781128	0.57491	0.857678	0.245274	0.139041	1.14045	0.440556	0.482737	0.487424	0.335885	0.137479	0.926418	0.168724	0.226527	0.44993	0.465552	0.195282	1.57632	0.409311	0.334323	0.246836	0.265584	0.0499922	0.0421809	0.120294	0.888924	0.0781128	0.943603	0.198406	0.0703015
M11869_f	Fetal-specific	0.450289	0.521858	0.0208743	0.498002	0.617284	0.059641	0.205761	0.152084	0.289259	0.459235	0.0477128	0.36381	0.0328025	0.325043	0.0536769	0.486074	0.489056	0.477128	0.0805153	0.599392	0.846902	0.304169	0.0834973	1.09143	0.432397	0.465199	0.506948	0.298205	0.134192	0.876722	0.175941	0.211725	0.539751	0.599392	0.193833	1.52681	0.435379	0.375738	0.235582	0.280313	0.0715692	0.0685871	0.152084	0.831991	0.0685871	0.918471	0.241546	0.062623
M11882_f	Fetal-specific	0.47658	0.605228	0.0175428	0.53798	0.654932	0.0321619	0.181276	0.187124	0.301152	0.429799	0.0204666	0.456114	0.0643237	0.356704	0.0321619	0.45319	0.517514	0.479504	0.090638	0.555523	0.815742	0.2456	0.157886	1.18999	0.438571	0.45319	0.546752	0.263143	0.108181	0.888837	0.160809	0.222209	0.429799	0.578914	0.210514	1.57008	0.350857	0.365476	0.213438	0.307	0.0613999	0.0350857	0.1228	0.894685	0.105257	0.86837	0.242676	0.0994094
M11987_f	Fetal-specific	0.457349	0.598474	0.018294	0.522685	0.674263	0.0418148	0.162032	0.193393	0.243048	0.499164	0.0470416	0.38156	0.0444282	0.287476	0.0235208	0.415534	0.449509	0.439055	0.0810161	0.57234	0.867656	0.258729	0.148965	1.06628	0.38156	0.486097	0.58018	0.331905	0.146352	0.930378	0.128058	0.227368	0.514844	0.538365	0.151579	1.47397	0.399854	0.392013	0.245662	0.258729	0.0444282	0.0261342	0.125444	0.838909	0.120217	0.953899	0.196007	0.0810161
M12092_f	Fetal-specific	0.447054	0.538882	0.0120825	0.514717	0.647625	0.0314146	0.212653	0.164323	0.251317	0.599294	0.0531632	0.345561	0.0410807	0.265816	0.0579962	0.517133	0.505051	0.46397	0.0604127	0.60896	0.840945	0.265816	0.135325	1.11401	0.340728	0.471219	0.56063	0.285148	0.0797448	0.937606	0.149824	0.183655	0.459137	0.548548	0.164323	1.5804	0.386642	0.331062	0.314146	0.299647	0.0531632	0.0531632	0.15224	0.889276	0.0845778	1.0681	0.157073	0.0555797
M11701_f	Fetal-specific	0.557634	0.478097	0.0227249	0.568996	0.652904	0.0314652	0.209768	0.166066	0.237737	0.575114	0.0305912	0.278817	0.0393315	0.286683	0.026221	0.487711	0.492955	0.503444	0.077789	0.664266	0.846939	0.323393	0.0839073	1.11177	0.413418	0.412544	0.466734	0.360102	0.123239	1.05758	0.164318	0.26221	0.414292	0.417788	0.169563	1.62046	0.417788	0.401182	0.258714	0.21239	0.0410796	0.0445757	0.160822	0.940461	0.0821592	0.863546	0.170437	0.0681747
M11758_f	Fetal-specific	0.489806	0.563068	0.0136057	0.502365	0.707498	0.0366308	0.204086	0.178968	0.222925	0.514924	0.0303512	0.296186	0.0429104	0.280487	0.0303512	0.47934	0.448989	0.469921	0.0764014	0.684473	0.824716	0.265835	0.113032	1.23603	0.374681	0.427011	0.502365	0.293046	0.109892	0.989032	0.128731	0.219785	0.371541	0.460502	0.165362	1.53535	0.43643	0.350609	0.261649	0.226064	0.0586093	0.0450036	0.169548	0.921003	0.077448	0.907397	0.166409	0.072215
M11797_f	Fetal-specific	0.576106	0.544561	0.013282	0.552862	0.684022	0.0381857	0.192589	0.172666	0.235755	0.60267	0.0182627	0.27062	0.0365254	0.247377	0.0282242	0.524638	0.53792	0.474831	0.0547882	0.707265	0.815181	0.322088	0.102935	1.0858	0.391818	0.448267	0.431664	0.332049	0.0979546	1.06256	0.146102	0.240736	0.413402	0.433324	0.13282	1.59218	0.439965	0.373556	0.287223	0.230774	0.0630894	0.0232435	0.151082	0.843405	0.0730509	0.934719	0.162704	0.0597689
M11805_f	Fetal-specific	0.518219	0.552703	0.0114947	0.518219	0.700218	0.0392735	0.220315	0.189662	0.244262	0.53163	0.0239473	0.298862	0.0421472	0.320894	0.0344841	0.501935	0.448293	0.426262	0.061305	0.644661	0.794092	0.24522	0.0977049	1.22323	0.383156	0.467451	0.548872	0.356335	0.123568	0.969386	0.150389	0.218399	0.411893	0.51343	0.17242	1.5604	0.382199	0.341967	0.28162	0.233725	0.0431051	0.0383156	0.146557	0.932986	0.0785471	0.941607	0.162841	0.0651366
M11883_f	Fetal-specific	0.623886	0.546643	0.0316894	0.592196	0.724896	0.0356506	0.247574	0.182214	0.293127	0.546643	0.0356506	0.354526	0.0376312	0.279263	0.0198059	0.483264	0.465439	0.47138	0.0673401	0.606061	0.877401	0.354526	0.102991	1.19232	0.43573	0.390176	0.507031	0.346603	0.108932	0.859576	0.164389	0.217865	0.406021	0.50307	0.20004	1.57061	0.406021	0.431769	0.259457	0.205981	0.0574371	0.0653595	0.154486	0.821945	0.102991	0.918994	0.172311	0.0792236
M11653_f	Fetal-specific	0.492001	0.594142	0.0129474	0.522212	0.663195	0.0302106	0.192772	0.178386	0.230176	0.492001	0.0489124	0.300668	0.043158	0.270457	0.050351	0.481931	0.494879	0.525089	0.0776844	0.598458	0.896248	0.256071	0.128035	1.06313	0.335194	0.456036	0.552423	0.320808	0.148176	1.03148	0.139544	0.188457	0.424387	0.516458	0.189895	1.67165	0.381229	0.378352	0.281966	0.296352	0.0388422	0.0474738	0.161123	0.845897	0.086316	1.12355	0.156807	0.07193
M11752_f	Fetal-specific	0.510727	0.654819	0.00960615	0.459494	0.565162	0.0480307	0.195325	0.196926	0.260967	0.614793	0.0480307	0.381044	0.0336215	0.313801	0.0560359	0.470701	0.486711	0.429075	0.0704451	0.597182	0.819725	0.252962	0.152097	1.13192	0.323407	0.4691	0.592379	0.305796	0.104067	0.862952	0.123279	0.241755	0.510727	0.571566	0.153698	1.57061	0.446686	0.387448	0.283381	0.23375	0.0608389	0.06244	0.152097	0.89017	0.0832533	0.983029	0.230548	0.0576369
M11766_f	Fetal-specific	0.4093	0.603052	0.0121095	0.474691	0.60063	0.0290627	0.171954	0.164689	0.232502	0.501332	0.0339065	0.4093	0.0387503	0.273674	0.0605473	0.431097	0.465004	0.467426	0.0532817	0.586098	0.874304	0.244611	0.186486	1.15767	0.341487	0.411722	0.518285	0.293049	0.130782	0.842819	0.164689	0.198595	0.532817	0.561879	0.198595	1.44587	0.387503	0.382659	0.266408	0.28094	0.046016	0.0339065	0.10172	0.750787	0.0799225	1.08985	0.193752	0.0532817
M11909_f	Fetal-specific	0.458913	0.603186	0.0107438	0.463517	0.687602	0.0445099	0.197992	0.201062	0.205667	0.529515	0.0429751	0.274734	0.0368358	0.299291	0.035301	0.506492	0.515701	0.43589	0.0844154	0.580164	0.805783	0.26399	0.115112	1.04368	0.376032	0.434356	0.521841	0.317709	0.12739	1.01912	0.145808	0.239433	0.437425	0.564816	0.165761	1.63459	0.403659	0.363754	0.265525	0.26706	0.0521841	0.0475796	0.136599	0.894803	0.070602	0.953126	0.202597	0.0644627
M12041_f	Fetal-specific	0.467235	0.521259	0.00730055	0.544621	0.711073	0.0584044	0.179594	0.175213	0.236538	0.515419	0.039423	0.308083	0.0452634	0.284721	0.0321224	0.524179	0.468695	0.429272	0.0861465	0.588424	0.842483	0.258439	0.093447	1.06734	0.389849	0.448254	0.512499	0.281801	0.112428	0.968053	0.12995	0.186894	0.442413	0.508118	0.157692	1.61634	0.325604	0.321224	0.2599	0.252599	0.0423432	0.0408831	0.13141	0.835183	0.0773858	0.998715	0.176673	0.0554842
M11910_f	Fetal-specific	0.448072	0.5888	0.0136492	0.50361	0.657988	0.0254158	0.203327	0.176499	0.277691	0.493726	0.0249452	0.338407	0.0343584	0.342172	0.0301225	0.455132	0.456544	0.47537	0.0767182	0.597272	0.832133	0.264042	0.115313	1.06182	0.417479	0.452778	0.505493	0.302637	0.124726	0.898497	0.140258	0.220741	0.418891	0.490902	0.166615	1.62991	0.367588	0.350644	0.23392	0.281927	0.056009	0.0348291	0.145435	0.850489	0.0682462	0.997336	0.204268	0.0578916
M11911_f	Fetal-specific	0.423499	0.525027	0.017385	0.490605	0.699573	0.0323361	0.212793	0.175589	0.269815	0.566056	0.0246867	0.314669	0.0511119	0.3477	0.0323361	0.468352	0.449229	0.512163	0.0629338	0.638378	0.852561	0.281637	0.11787	1.06014	0.419674	0.406114	0.493387	0.325447	0.124824	1.02259	0.146382	0.214879	0.38699	0.45966	0.166896	1.67835	0.384557	0.329272	0.251387	0.235045	0.0598045	0.045201	0.134212	0.840392	0.0876205	0.95409	0.183586	0.0594568
M11912_f	Fetal-specific	0.431996	0.532861	0.0139353	0.494373	0.681504	0.0285343	0.197086	0.191113	0.300605	0.550114	0.0278707	0.370282	0.0457875	0.320513	0.0364973	0.483092	0.485083	0.496364	0.0716675	0.593911	0.847401	0.259463	0.106838	1.10554	0.413415	0.449912	0.498354	0.319849	0.127409	0.94893	0.128736	0.215002	0.414079	0.459203	0.161915	1.69613	0.392844	0.325822	0.246855	0.228274	0.0550778	0.0404788	0.124754	0.841429	0.0829485	0.931013	0.195095	0.064368
M11915_f	Fetal-specific	0.44293	0.501609	0.01325	0.500663	0.710297	0.030759	0.216733	0.182188	0.273992	0.530948	0.030759	0.398448	0.0477948	0.305698	0.0293394	0.469903	0.490725	0.507761	0.0733485	0.609502	0.95495	0.257903	0.131081	1.07325	0.393242	0.430627	0.505868	0.319894	0.131081	0.99328	0.16184	0.21342	0.379519	0.475109	0.17367	1.63449	0.427314	0.35018	0.243706	0.243233	0.0496877	0.0402234	0.146697	0.845164	0.0851789	0.931762	0.177456	0.0544198
M11918_f	Fetal-specific	0.457578	0.548573	0.00965667	0.491747	0.703823	0.0293414	0.205761	0.189419	0.25293	0.559715	0.0259987	0.304185	0.0445692	0.314585	0.0360268	0.444578	0.465377	0.488405	0.080596	0.621369	0.840873	0.254045	0.111795	1.12314	0.410037	0.459063	0.469091	0.309013	0.133708	0.979038	0.135936	0.233617	0.409666	0.499918	0.155992	1.61861	0.416351	0.349869	0.248102	0.244017	0.0597971	0.0337983	0.160821	0.856844	0.0820817	0.985352	0.17642	0.0605399
M11973_f	Fetal-specific	0.474719	0.629179	0.0124216	0.502803	0.617837	0.0378047	0.178222	0.180923	0.257072	0.510364	0.0302438	0.31648	0.0372647	0.286776	0.0367246	0.470939	0.434754	0.457437	0.0745293	0.599475	0.787419	0.290556	0.110714	1.06609	0.394789	0.421253	0.532507	0.325121	0.123675	0.96132	0.130156	0.228989	0.469319	0.534667	0.189564	1.5743	0.388309	0.367246	0.263553	0.266793	0.0534667	0.039965	0.168501	0.820363	0.0826303	1.05799	0.168501	0.0702088
M11976_f	Fetal-specific	0.471354	0.555674	0.0102551	0.525288	0.643412	0.0379818	0.189149	0.171678	0.254858	0.557193	0.0395011	0.284484	0.0436791	0.302715	0.0341836	0.50174	0.481609	0.482749	0.0816609	0.603151	0.823825	0.287902	0.0983729	1.08932	0.362346	0.443627	0.515033	0.3331	0.128378	0.98031	0.139013	0.241564	0.443627	0.537822	0.162942	1.62828	0.398429	0.319807	0.264733	0.264733	0.058492	0.037602	0.148129	0.840537	0.0843196	0.983729	0.173577	0.0721654
M11991_f	Fetal-specific	0.444184	0.679619	0.0180773	0.527254	0.630552	0.0408891	0.184216	0.15753	0.262981	0.465274	0.0365849	0.49196	0.0417499	0.411473	0.0443323	0.426537	0.442463	0.446767	0.0714482	0.512189	0.799704	0.272881	0.184216	1.03815	0.438589	0.367141	0.557382	0.274172	0.122237	0.792817	0.162695	0.208749	0.46054	0.629261	0.165708	1.29726	0.384788	0.375749	0.214345	0.313339	0.0641313	0.0417499	0.140744	0.790235	0.0912472	1.00458	0.247486	0.060688
M11993_f	Fetal-specific	0.484719	0.560811	0.0134527	0.519191	0.62387	0.0466641	0.184134	0.168579	0.269895	0.495228	0.036995	0.372893	0.0437214	0.342624	0.0441418	0.481776	0.461597	0.480094	0.0954303	0.563333	0.797915	0.277883	0.129062	1.03124	0.392651	0.381301	0.557027	0.312355	0.117291	0.918149	0.14798	0.209778	0.45445	0.574263	0.178669	1.43145	0.392651	0.383823	0.239206	0.29638	0.0504477	0.0428806	0.139992	0.80296	0.0849203	0.998024	0.222811	0.0689452
M11999_f	Fetal-specific	0.503005	0.552829	0.0116608	0.490284	0.648236	0.0333923	0.203004	0.192934	0.258128	0.518376	0.0349825	0.311662	0.0477033	0.28145	0.0381627	0.507246	0.466963	0.440991	0.0805657	0.610073	0.830568	0.27933	0.106537	1.01979	0.390637	0.395938	0.544348	0.361485	0.119258	0.955127	0.162191	0.230036	0.487634	0.539578	0.166432	1.56255	0.391697	0.368906	0.263959	0.266609	0.057244	0.0323323	0.155831	0.85866	0.0863961	1.03039	0.180213	0.0657246
M11518_m	Shared	0.443594	0.559949	0.0172938	0.52385	0.674121	0.0319011	0.206686	0.174617	0.325056	0.495643	0.0288789	0.409006	0.0448295	0.384996	0.025353	0.451653	0.472808	0.499169	0.0815998	0.61989	0.85579	0.278883	0.150775	0.920936	0.462567	0.422438	0.499673	0.321194	0.146913	0.876442	0.160177	0.225826	0.405648	0.495307	0.167397	1.48374	0.393895	0.357629	0.241777	0.261925	0.0658171	0.0411357	0.162528	0.776877	0.100573	0.921103	0.222972	0.0602764
M11537_m	Shared	0.502831	0.521389	0.0120774	0.548489	0.690177	0.0291624	0.208261	0.183222	0.274539	0.5208	0.0291624	0.347887	0.0406506	0.33581	0.0259222	0.46218	0.496645	0.504304	0.090433	0.632147	0.872811	0.301345	0.136091	0.941151	0.436847	0.429777	0.488102	0.324027	0.138153	0.967073	0.162308	0.217393	0.406506	0.48987	0.176742	1.61277	0.42153	0.338461	0.255392	0.242136	0.0645108	0.0394724	0.145812	0.803292	0.0880764	0.95912	0.200897	0.0615651
M11549_m	Shared	0.542009	0.528407	0.0189245	0.509779	0.654669	0.0260212	0.217632	0.192793	0.298948	0.509779	0.0283867	0.330883	0.0461285	0.326152	0.020403	0.507709	0.495881	0.485532	0.0771765	0.584885	0.832678	0.331179	0.130993	0.962192	0.440586	0.479026	0.453301	0.355721	0.153466	0.93144	0.175643	0.239513	0.403033	0.473408	0.167955	1.51426	0.450344	0.375829	0.289486	0.249567	0.0606175	0.0455371	0.165294	0.801926	0.0958053	0.936763	0.204917	0.0730367
M11570_m	Shared	0.49751	0.523722	0.0139682	0.554073	0.680821	0.0334547	0.214007	0.195383	0.285917	0.521997	0.0246599	0.327477	0.0405251	0.342652	0.024315	0.454571	0.51303	0.499752	0.0841542	0.627707	0.857752	0.287642	0.130542	0.943803	0.451639	0.493716	0.487163	0.340411	0.150546	0.922764	0.155547	0.226423	0.393697	0.468539	0.172964	1.55616	0.399732	0.365415	0.282468	0.234356	0.0603565	0.0431118	0.170895	0.830678	0.102089	0.913452	0.194003	0.0679442
M11714_m	Shared	0.458716	0.559488	0.0148791	0.51299	0.669897	0.0260384	0.194612	0.178211	0.31821	0.49828	0.0287437	0.368596	0.0473426	0.3806	0.0250239	0.442146	0.449416	0.505382	0.0879219	0.601589	0.874654	0.277123	0.132559	0.937552	0.475793	0.445865	0.49287	0.330722	0.142535	0.906103	0.151496	0.227921	0.390238	0.498788	0.169081	1.52883	0.401566	0.355915	0.241785	0.247027	0.0661105	0.0388885	0.158428	0.7705	0.100941	0.954629	0.221157	0.0654342
M11842_m	Shared	0.527436	0.52883	0.0137087	0.524183	0.575068	0.0313673	0.181234	0.196801	0.292994	0.476086	0.0290438	0.294621	0.0483289	0.340161	0.0262556	0.467257	0.486078	0.468419	0.0822521	0.520698	0.813692	0.287185	0.13244	0.792316	0.447507	0.486078	0.486775	0.371529	0.144057	0.935676	0.141966	0.217248	0.456569	0.57228	0.186578	1.72474	0.408472	0.362235	0.272083	0.263718	0.066917	0.0401967	0.154281	0.719822	0.0985167	1.00492	0.213066	0.0699375
M11869_m	Shared	0.584723	0.447873	0.0124409	0.516298	0.609604	0.0311023	0.248818	0.192834	0.373227	0.534959	0.0311023	0.211495	0.0497636	0.391889	0.0248818	0.41677	0.559841	0.391889	0.0995272	0.422991	0.796218	0.261259	0.105748	0.752675	0.510077	0.522518	0.510077	0.41677	0.14307	0.833541	0.211495	0.199054	0.329684	0.503857	0.174173	1.57377	0.41677	0.27992	0.2737	0.242598	0.0933068	0.0622045	0.0559841	0.678029	0.13685	1.18811	0.211495	0.068425
M11882_m	Shared	0.499197	0.586599	0.0132205	0.500176	0.612061	0.0291341	0.18778	0.182884	0.299665	0.496994	0.0364788	0.343733	0.0472511	0.359647	0.0259514	0.456353	0.455129	0.456598	0.0940126	0.500176	0.817714	0.2649	0.150812	0.854192	0.436277	0.471532	0.539593	0.338592	0.133919	0.859334	0.14616	0.238214	0.476918	0.594678	0.181905	1.61119	0.39025	0.355485	0.267838	0.289627	0.0678164	0.0345202	0.153505	0.758711	0.0981746	1.0148	0.228176	0.0771197
M11987_m	Shared	0.491125	0.599273	0.015609	0.502274	0.617112	0.0395799	0.197342	0.217411	0.298243	0.510636	0.0256433	0.34953	0.0440396	0.357334	0.0278732	0.456005	0.487223	0.486665	0.0797173	0.527918	0.827833	0.297685	0.14494	0.821143	0.429804	0.512309	0.510079	0.346185	0.152745	0.882464	0.160549	0.231347	0.457677	0.605963	0.200129	1.48285	0.399144	0.333921	0.277617	0.273714	0.0557463	0.0351202	0.165009	0.775989	0.101458	0.995072	0.193997	0.0735852
M12092_m	Shared	0.497743	0.581828	0.020316	0.498307	0.62246	0.0310384	0.205418	0.187359	0.260722	0.502257	0.0225734	0.318284	0.0485327	0.331828	0.0259594	0.472348	0.493228	0.479684	0.0671558	0.568849	0.826749	0.270316	0.126975	0.828442	0.417043	0.523138	0.533296	0.340293	0.148984	0.901242	0.147856	0.235892	0.472348	0.564898	0.185666	1.49436	0.387698	0.352144	0.272573	0.271445	0.0581264	0.0361174	0.180023	0.821106	0.0880361	1.03273	0.190181	0.0620767
M11701_m	Shared	0.577877	0.517909	0.0140835	0.565611	0.646932	0.03271	0.217613	0.188991	0.302568	0.537898	0.0286213	0.307111	0.0526995	0.315743	0.0181722	0.507005	0.470661	0.517909	0.0699631	0.625579	0.870904	0.330735	0.131294	0.953588	0.473841	0.503371	0.453397	0.370714	0.160824	0.95586	0.187174	0.257591	0.400698	0.453852	0.183994	1.53919	0.449763	0.383888	0.27849	0.226699	0.0649657	0.0526995	0.179905	0.816388	0.0749605	0.916335	0.174908	0.0636028
M11758_m	Shared	0.478331	0.549218	0.0148437	0.516804	0.654335	0.0287786	0.19933	0.19418	0.298389	0.517712	0.0281728	0.334438	0.0502869	0.334741	0.0248405	0.491054	0.478937	0.48651	0.090274	0.587387	0.844577	0.286272	0.126626	0.952724	0.425318	0.51438	0.509836	0.329591	0.139652	0.935457	0.148437	0.228714	0.384725	0.478331	0.164796	1.53526	0.410474	0.377152	0.281425	0.243558	0.0560426	0.0430165	0.171763	0.815496	0.0987562	0.918493	0.19933	0.076642
M11797_m	Shared	0.598746	0.509132	0.0148851	0.536168	0.655856	0.0322004	0.218416	0.200797	0.280691	0.561381	0.0230871	0.308638	0.043744	0.276134	0.0200493	0.542851	0.500018	0.49455	0.0798936	0.600569	0.871538	0.340839	0.120296	0.89979	0.441997	0.528573	0.459312	0.376684	0.164344	0.964494	0.157661	0.24363	0.411923	0.451718	0.170723	1.54562	0.450199	0.35542	0.317448	0.225099	0.0595404	0.0416176	0.195633	0.78162	0.0999429	0.929864	0.184089	0.0777671
M11805_m	Shared	0.513651	0.525758	0.0149887	0.519224	0.669495	0.0242125	0.216375	0.195814	0.260381	0.549586	0.025942	0.284785	0.0451583	0.296123	0.0228674	0.507886	0.523836	0.504235	0.0812849	0.642785	0.838599	0.284593	0.115298	0.965618	0.432559	0.532099	0.482905	0.350121	0.156228	0.973305	0.150271	0.242702	0.388169	0.474642	0.177751	1.53788	0.43448	0.347815	0.28517	0.23809	0.0630294	0.0453504	0.169295	0.83341	0.0880106	0.964657	0.186206	0.0735984
M11883_m	Shared	0.62279	0.503803	0.0154411	0.544979	0.670324	0.0281572	0.206486	0.190743	0.2955	0.528932	0.0263406	0.302463	0.047837	0.327896	0.019377	0.499261	0.4926	0.488664	0.0874994	0.584641	0.814441	0.346062	0.114748	0.919198	0.416909	0.422056	0.468076	0.362108	0.135942	0.926767	0.163494	0.237974	0.40389	0.44113	0.191954	1.62252	0.481095	0.381182	0.27915	0.220111	0.0644892	0.0445066	0.143511	0.819891	0.0829579	0.9304	0.203156	0.0669113
M11653_m	Shared	0.476611	0.60074	0.0128814	0.505886	0.633139	0.0288855	0.207273	0.184633	0.285732	0.520329	0.0316179	0.364972	0.0503544	0.323596	0.0265434	0.478953	0.495737	0.471926	0.0819723	0.579661	0.868126	0.255285	0.156138	0.888424	0.449286	0.567561	0.54453	0.348578	0.167458	0.923165	0.156138	0.229523	0.422353	0.571855	0.165896	1.48916	0.364191	0.346236	0.303688	0.276364	0.0534772	0.0296662	0.174484	0.799816	0.108125	1.03207	0.212347	0.0683103
M11752_m	Shared	0.498516	0.609913	0.0135093	0.513354	0.599504	0.0274616	0.185809	0.174292	0.264207	0.522434	0.0256899	0.348363	0.0480578	0.339283	0.0252469	0.473934	0.488772	0.463746	0.0843779	0.556318	0.810781	0.275502	0.141737	0.939895	0.417903	0.521991	0.53395	0.331975	0.153696	0.908225	0.145502	0.239181	0.47194	0.575807	0.180715	1.51725	0.392656	0.355672	0.287461	0.281038	0.0547017	0.0414138	0.164991	0.781769	0.104088	1.01829	0.207955	0.0675466
M11766_m	Shared	0.493	0.604532	0.0117782	0.542036	0.588428	0.027883	0.216093	0.192056	0.276186	0.498289	0.0266812	0.40863	0.0425456	0.328827	0.0305271	0.459108	0.488433	0.463675	0.0850912	0.545882	0.812693	0.29157	0.15528	0.949945	0.418005	0.477376	0.514634	0.335317	0.147107	0.866296	0.164414	0.232439	0.487232	0.546122	0.20119	1.40016	0.405505	0.375219	0.267773	0.267533	0.0603331	0.0377382	0.172586	0.795146	0.104802	1.00259	0.216334	0.0663423
M11909_m	Shared	0.509115	0.53772	0.017053	0.53882	0.611708	0.0332809	0.213988	0.209587	0.297878	0.544871	0.0349312	0.318231	0.0426325	0.330058	0.0275049	0.50829	0.481335	0.479135	0.0767386	0.574852	0.810293	0.297053	0.127348	0.90491	0.434577	0.560824	0.499488	0.350687	0.160353	0.90381	0.176581	0.233241	0.42495	0.548722	0.19666	1.53615	0.401296	0.363339	0.303929	0.256895	0.0613359	0.0390569	0.173556	0.800667	0.0992926	0.977798	0.198585	0.0723378
M12041_m	Shared	0.484197	0.569537	0.0105918	0.495697	0.610088	0.0329859	0.203665	0.187324	0.286887	0.538972	0.0317754	0.315636	0.0499328	0.333188	0.0329859	0.477842	0.484802	0.490855	0.0968394	0.569234	0.82253	0.252993	0.128917	0.851582	0.41762	0.485105	0.523235	0.345596	0.14072	0.935408	0.142838	0.209718	0.479658	0.546235	0.167653	1.56607	0.390081	0.348622	0.265703	0.268124	0.0593141	0.0384331	0.157969	0.756255	0.0916948	1.02529	0.201547	0.0668797
M11910_m	Shared	0.453784	0.544216	0.0155232	0.483206	0.645659	0.0267144	0.212993	0.181044	0.311187	0.496383	0.0232849	0.383207	0.0487358	0.391872	0.0231044	0.461907	0.481581	0.487177	0.0774357	0.602699	0.86533	0.26191	0.145666	0.890781	0.465878	0.551617	0.48122	0.327432	0.159925	0.896738	0.155593	0.228878	0.392052	0.490246	0.158481	1.63012	0.375446	0.346565	0.280501	0.250899	0.0626345	0.0393496	0.155593	0.71425	0.106316	0.923994	0.208481	0.0792407
M11911_m	Shared	0.451924	0.498573	0.0136533	0.494705	0.69336	0.0307199	0.212536	0.176583	0.318577	0.501076	0.0279893	0.372963	0.0459661	0.386161	0.022528	0.451697	0.484692	0.489016	0.0837403	0.59847	0.877908	0.264874	0.136988	0.852877	0.47377	0.457841	0.480369	0.33883	0.143132	0.937527	0.154965	0.230513	0.38343	0.475135	0.159744	1.63089	0.38161	0.329045	0.254862	0.233472	0.070087	0.0398221	0.142905	0.743195	0.0907945	0.955504	0.209806	0.0723625
M11912_m	Shared	0.456484	0.549116	0.0156438	0.482322	0.667588	0.0261903	0.194933	0.176652	0.321841	0.506403	0.0274207	0.358402	0.0404279	0.383362	0.0267176	0.464745	0.485135	0.516598	0.0796254	0.608704	0.898203	0.264891	0.123569	0.899081	0.450683	0.462284	0.483729	0.329048	0.138861	0.937224	0.165051	0.216904	0.376858	0.479686	0.162942	1.65614	0.396721	0.331333	0.259266	0.233251	0.0648604	0.0418341	0.152044	0.750904	0.106343	0.930369	0.219365	0.0655635
M11915_m	Shared	0.433993	0.509852	0.0152195	0.484645	0.669419	0.0268719	0.19167	0.197377	0.290121	0.502956	0.0254451	0.401651	0.0492255	0.341249	0.0235426	0.446834	0.500578	0.565736	0.0867985	0.614724	0.977138	0.263249	0.146012	0.887961	0.463005	0.498675	0.475608	0.321273	0.161707	0.932193	0.157902	0.225438	0.39095	0.484407	0.173121	1.55738	0.390237	0.318182	0.255877	0.224012	0.0649205	0.0394755	0.160042	0.759071	0.0967863	0.938851	0.199518	0.068012
M11918_m	Shared	0.472776	0.521987	0.0127421	0.474533	0.655779	0.0257039	0.201237	0.183662	0.307129	0.512101	0.023507	0.348431	0.0459155	0.381165	0.0246054	0.454761	0.476511	0.497821	0.0856796	0.581523	0.864925	0.283841	0.126762	0.918969	0.453223	0.47014	0.464867	0.347552	0.14917	0.929295	0.150269	0.223206	0.382483	0.479806	0.148951	1.64856	0.390831	0.343378	0.265607	0.240782	0.0645893	0.0410823	0.171359	0.76848	0.0997399	1.01234	0.200798	0.0692028
M11973_m	Shared	0.497492	0.596747	0.0143531	0.477057	0.59626	0.02676	0.181968	0.181968	0.319417	0.494086	0.0308956	0.36053	0.0484112	0.343014	0.0270032	0.494573	0.495789	0.433998	0.0909838	0.535929	0.806934	0.281953	0.146936	0.808637	0.45273	0.558796	0.503574	0.354448	0.154721	0.858265	0.148396	0.220648	0.436431	0.586043	0.175156	1.54235	0.384127	0.340095	0.27952	0.26395	0.062521	0.0379505	0.160316	0.701597	0.100228	1.0232	0.210674	0.07955
M11976_m	Shared	0.499288	0.566534	0.013377	0.524957	0.621127	0.031454	0.187278	0.183301	0.266817	0.500011	0.0256694	0.295017	0.0480849	0.342379	0.0321771	0.491334	0.503265	0.479765	0.088939	0.572681	0.821059	0.291402	0.125816	0.81889	0.435657	0.526042	0.525319	0.354671	0.136662	0.955914	0.148232	0.241148	0.441803	0.565088	0.174263	1.58933	0.402756	0.343464	0.277302	0.268625	0.0697774	0.0448311	0.163416	0.769359	0.107016	1.00291	0.207524	0.0777313
M11991_m	Shared	0.434252	0.686295	0.0133781	0.496059	0.614321	0.0278264	0.195855	0.154383	0.31599	0.449236	0.0299669	0.540742	0.0446828	0.465289	0.037191	0.421409	0.408566	0.451376	0.0965897	0.500072	0.773252	0.271575	0.188898	0.866899	0.475457	0.361208	0.549304	0.29619	0.13164	0.738202	0.156523	0.23813	0.432914	0.665693	0.179801	1.2669	0.361208	0.375924	0.215387	0.320271	0.0679606	0.0481611	0.140737	0.733921	0.0923087	1.01218	0.277194	0.0556528
M11993_m	Shared	0.479278	0.582069	0.0169667	0.514822	0.621823	0.0330665	0.187996	0.162236	0.297846	0.478659	0.0335619	0.376364	0.0484232	0.384785	0.0297227	0.478164	0.472095	0.467142	0.0967226	0.537733	0.811925	0.269857	0.144403	0.841152	0.45067	0.485842	0.523862	0.336857	0.148118	0.858366	0.148613	0.220072	0.447079	0.58467	0.177841	1.4465	0.392216	0.338962	0.251281	0.301685	0.0620461	0.0414879	0.157283	0.724367	0.104896	1.00302	0.217595	0.0755452
M11999_m	Shared	0.494277	0.53531	0.0128424	0.518396	0.616124	0.0253716	0.192323	0.176349	0.28222	0.507433	0.0263113	0.291931	0.043539	0.331398	0.0238055	0.475797	0.481122	0.48676	0.0889574	0.571958	0.79028	0.287232	0.124666	0.875792	0.392164	0.472664	0.53625	0.35395	0.128424	0.931547	0.145965	0.243067	0.435703	0.562248	0.184806	1.56646	0.39561	0.359588	0.255283	0.264053	0.0645254	0.0404067	0.152543	0.781196	0.0980411	1.03554	0.204226	0.0723562
[truncated: 208 more columns]
